# Supplementary material for: Facile and diverse microwave-assisted synthesis of secondary propargylamines in water using CuCl/CuCl2
Source: Royal Society of Chemistry journal article supplement (doi:10.1039/c4ra16005c), 2015-01-01

## ***Supporting Information***

# **Facile and Diverse Microwave-Assisted Synthesis of Secondary Propargylamines in Water Using CuCl/CuCl<sub>2</sub>**

Tran Thi Thu Trang,<sup>a,b</sup> Denis S. Ermolat'ev,<sup>\*a</sup> Erik V. Van der Eycken<sup>\*a</sup>

<sup>a</sup>*Laboratory for Organic & Microwave-Assisted Chemistry (LOMAC), Department of Chemistry, University of Leuven (KU Leuven), Celestijnenlaan 200F, B-3001 Leuven, Belgium*

<sup>b</sup>*Department of Chemistry, Hanoi National University of Education, Xuan Thuy 136, Hanoi, Vietnam*

\* Corresponding authors. Fax: +32 16327990 (E. V. Van der Eycken).

Email addresses: [ermolatev@gmail.com](mailto:ermolatev@gmail.com) (D. S. Ermolat'ev),  
[erik.vandereycken@chem.kuleuven.be](mailto:erik.vandereycken@chem.kuleuven.be) (E. V. Van der Eycken)

| <b>Table of contents for supporting information:</b>                   | <b>Page</b> |
|------------------------------------------------------------------------|-------------|
| <b><i>General Remarks</i></b>                                          | <b>2</b>    |
| <b><i>Microwave Irradiation Experiments</i></b>                        | <b>2</b>    |
| <b><i>General Procedure for the Preparation of Propargylamines</i></b> | <b>2</b>    |
| <b><i>Spectroscopic data of Propargylamines</i></b>                    | <b>3</b>    |
| <b><i><sup>1</sup>H NMR and <sup>13</sup>C NMR spectra</i></b>         | <b>10</b>   |

**General Remarks.**

$^1\text{H}$  and  $^{13}\text{C}$  NMR spectra were recorded on 300 MHz instrument. The  $^1\text{H}$  chemical shifts are reported in ppm relative to tetramethylsilane. High-resolution mass spectra were recorded by using ion source temperature 150–250°C as required. High-resolution EI-mass spectra were performed with a resolution of 10000. For thin layer chromatography, analytical TLC plates SIL G/UV254 and 70–230 mesh silica gel were used. Reagents were used without further purification. Solvents like water, heptane and ethyl acetate were used after distillation.

**Microwave Irradiation Experiments.**

All microwave irradiation experiments were carried out in a dedicated CEM-Discover monomode microwave apparatus, operating at a frequency of 2.45GHz with continuous irradiation power from 0 to 100 W with utilization of the standard absorbance level of 100 W maximum power. The reactions were carried out in 10 mL glass tubes, sealed with Teflon septum and placed in the microwave cavity. The reaction was irradiated at a required ceiling temperature using maximum power for the stipulated time. Then it was cooled to ambient temperature with gas jet cooling.

**General Procedure for the Preparation of Alkylsubstituted Propargylamines.**

To a microwave vial equipped with magnetic stir bar was added amine (2.6 or 3.0 mmol), aldehyde (2.0 mmol), acetylene (3.2 mmol), CuCl (0.2 mmol), CuCl<sub>2</sub> (0.2 mmol) and water (3.0 mL). The microwave vial was flushed with argon. The reaction vessel was then sealed and irradiated in a cavity of CEM-Discover microwave reactor at 100 W for 25 min at a ceiling temperature of 110°C. The resulting reaction mixture was extracted with EtOAc (20mL). Organic phase was dried over anhydrous Na<sub>2</sub>SO<sub>4</sub> and the solvent was removed under reduced pressure. The residue was then loaded directly onto a column and flashed on silica gel (10–15% EtOAc in heptane) to afford the product as a yellowish oil. The identity and purity of the products were confirmed by  $^1\text{H}$ ,  $^{13}\text{C}$  NMR, and HRMS.

## Spectroscopic data of Propargylamines.

### ***N*-(2-methoxyethyl)-1-(4-propylphenyl)undec-1-yn-3-amine (4a):**

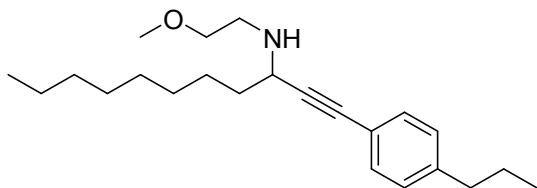

$^1\text{H}$  NMR (300 MHz,  $\text{CDCl}_3$ ):  $\delta$  7.32 (d,  $J = 7.91$  Hz, 2H), 7.09 (d,  $J = 7.91$  Hz, 2H), 3.58 (m, 3H), 3.36 (s, 3H), 3.15 (m, 1H), 2.80 (m, 1H), 2.56 (m, 2H), 1.63 (m, 6H), 1.28 (m, 10H), 0.90 (m, 6H).  $^{13}\text{C}$  NMR (75,5 MHz,  $\text{CDCl}_3$ )  $\delta$  142.6, 131.6, 128.4, 120.7, 90.3, 83.9, 72.2, 58.7, 51.0, 47.0, 37.9, 36.2, 31.9, 29.6, 29.5, 29.3, 26.2, 24.4, 22.7, 14.1, 13.8. HRMS (EI) ( $[\text{M}+\text{H}]^+$ ) Calcd. for  $\text{C}_{23}\text{H}_{37}\text{NO}$ : 344.2875, found 344.2884.

### **1-(4-Fluorophenyl)-*N*-isobutyl-4-methylpent-1-yn-3-amine (4b):**

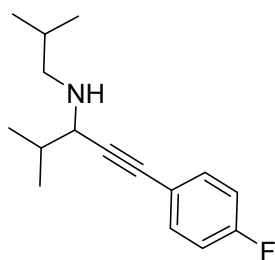

$^1\text{H}$  NMR (300 MHz,  $\text{CDCl}_3$ ):  $\delta$  7.43 (m, 2H), 7.24 (m, 2H), 2.58 (brs, 1H), 2.51 (m, 1H), 2.38 (m, 1H), 1.85 (m, 1H), 1.66 (m, 1H), 1.01 (m, 6H), 0.88 (m, 6H).  $^{13}\text{C}$  NMR (75,5 MHz,  $\text{CDCl}_3$ )  $\delta$  162.8 (d,  $J = 250.8$  Hz), 133.5, 129.3 (d,  $J = 8.2$  Hz), 123.8 (d,  $J = 3.84$  Hz), 115.4 (d,  $J = 20.9$  Hz), 112.2 (d,  $J = 15.9$  Hz), 95.9, 95.81, 57.5, 56.0, 32.9, 28.5, 20.8, 20.6, 19.8, 18.0. HRMS (EI) ( $[\text{M}+\text{H}]^+$ ) Calcd. for  $\text{C}_{16}\text{H}_{23}\text{FN}$ : 248.1736, found 248.1738.

### **1-(4-Fluorophenyl)-*N*-pentyl-1-yn-3-amine (4c)**

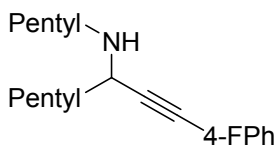

$^1\text{H}$  NMR ( $\text{CDCl}_3$ , 300 MHz):  $\delta$  7.38 (m, 2H), 7.38 (m, 2H), 6.98 (t,  $J = 7.35$  Hz, 2H), 3.57 (m, 1H), 2.88 (m, 1H), 2.67 (m, 1H), 1.69 (m, 2H), 1.57-1.26 (br, 15H), 0.90 (8H).  $^{13}\text{C}$  NMR (75.5 MHz,  $\text{CDCl}_3$ ):  $\delta$  163.9, 160.6, 133.5, 133.4, 119.6, 119.5, 115.6, 115.3, 90.9, 90.8, 82.6, 50.9, 47.6, 36.1, 31.7, 29.7, 29.6, 25.9, 22.6, 22.5, 14.1. HRMS (ESI) ( $[\text{M}]^+$ ) Calcd. for  $\text{C}_{19}\text{H}_{28}\text{FN}$ : 289.2206, found 289.2218.

***N*-Benzyl-4-methyl-1-phenylpent-1-yn-3-amine (4d)**

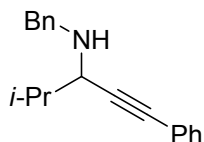

$^1\text{H}$  NMR (300 MHz,  $\text{CDCl}_3$ ):  $\delta$  7.46–7.43 (m, 2H), 7.41–7.35 (m, 3H), 7.33–7.29 (m, 5H), 4.10 (d,  $J = 12.99$  Hz, 1H), 3.89 (d,  $J = 12.99$  Hz, 1H), 3.40 (t,  $J = 5.46$  Hz, 1H), 2.00–1.89 (m, 1H), 1.06 (d,  $J = 6.78$  Hz, 6H).  $^{13}\text{C}$  NMR (75.5 MHz,  $\text{CDCl}_3$ ):  $\delta$  140.1, 131.6, 128.4, 128.3, 128.2, 127.8, 126.9, 123.5, 89.6, 84.6, 56.1, 51.7, 32.9, 19.8, 18.0. HRMS (ESI) ( $[\text{M}]^+$ ) Calcd. for  $\text{C}_{19}\text{H}_{21}\text{N}$ : 263.1674, found 263.1677.

***N*-tert-butyl-5-methyl-1-phenylhex-1-yn-3-amine (4e)**

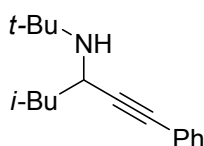

$^1\text{H}$  NMR (300 MHz,  $\text{CDCl}_3$ ):  $\delta$  7.39–7.36 (m, 2H), 7.20–7.27 (m, 3H), 3.63 (q,  $J = 6.78, 8.46$  Hz, 1H), 1.97–1.88 (m, 1H), 1.64–1.54 (m, 1H), 1.49–1.44 (m, 1H), 1.20 (s, 9H), 0.95 (dd,  $J = 18.9, 6.6$ , 6H).  $^{13}\text{C}$  NMR (300 MHz,  $\text{CDCl}_3$ ):  $\delta$  131.3, 128.1, 127.6, 123.8, 94.4, 82.4, 51.3, 47.8, 42.7, 29.9, 25.1, 22.9, 22.1. HRMS (ESI) ( $[\text{M}]^+$ ) Calcd for  $\text{C}_{17}\text{H}_{25}\text{N}$ : 243.1987, found 243.1990.

***N*-(1-(4-hexylphenyl)hex-1-yn-3-yl)heptan-1-amine (4f)**

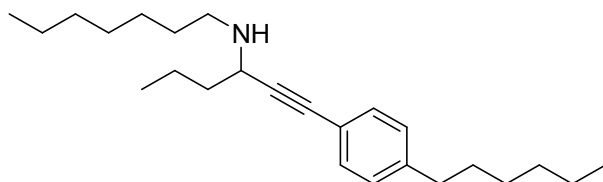

$^1\text{H}$  NMR (300 MHz,  $\text{CDCl}_3$ )  $\delta$  7.35 (d,  $J = 8.0$  Hz, 2H), 7.11 (d,  $J = 8.0$  Hz, 2H), 3.57 (m, 1H), 2.89 (m, 1H), 2.64 (m, 1H), 2.58 (m, 2H), 1.72–1.43 (m, 8H), 1.28 (br, 14H), 1.13 (brs, 1H), 0.96 (m, 3H), 0.88 (m, 6H).  $^{13}\text{C}$  NMR (75.5 MHz,  $\text{CDCl}_3$ )  $\delta$  142.9, 131.6, 128.3, 120.7, 90.7, 83.7, 50.7, 47.7, 38.5, 35.9, 31.9, 31.7, 31.3, 31.2, 30.2, 29.3, 28.9, 27.5, 22.7, 19.5, 14.1, 14.0. HRMS (EI) ( $[\text{M}+\text{H}]^+$ ) Calcd for  $\text{C}_{25}\text{H}_{42}\text{N}$ : 356.3239, found 356.3245.

**1-(4-Butylphenyl)-5-methyl-N-phenethylhex-1-yn-3-amine (4g):**

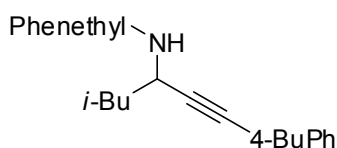

$^1\text{H}$  NMR ( $\text{CDCl}_3$ , 300 MHz):  $\delta$  7.33-7.05 (m, 9H), 3.61 (m, 1H), 3.26-3.16 (m, 1H), 3.01-2.76 (m, 3H), 2.58 (t,  $J = 7.7$  Hz, 2H), 1.72-1.25 (m, 11H), 0.91 (t,  $J = 7.2$  Hz, 6H).  $^{13}\text{C}$  NMR (75.5 MHz,  $\text{CDCl}_3$ ):  $\delta$  142.9, 140.0, 131.5, 128.8, 128.5, 128.3, 126.2, 120.5, 90.2, 83.9, 50.8, 48.6, 36.3, 35.8, 35.5, 33.4, 28.4, 22.5, 22.3, 14.0, 13.9. HRMS (ESI) ( $[\text{M}]^+$ ) Calcd for  $\text{C}_{25}\text{H}_{33}\text{N}$ : 347.2613, found 347.2615.

***N*-benzyl-2-methyldec-5-yn-4-amine (4h):**

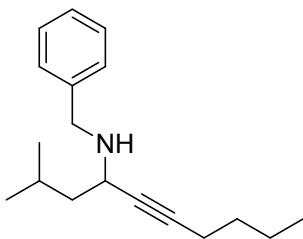

$^1\text{H}$  NMR (300 MHz,  $\text{CDCl}_3$ )  $\delta$  7.37-7.21 (m, 5H), 4.02 (d,  $J = 12.81$  Hz, 2H), 3.79 (d,  $J = 12.81$  Hz, 2H), 3.39 (m, 1H), 2.23 (m, 2H), 1.89 (m, 1H), 1.57-1.26 (m, 8H), 0.9 (m, 9H).  $^{13}\text{C}$  NMR (75.5 MHz,  $\text{CDCl}_3$ )  $\delta$  140.5, 128.4, 128.3, 126.9, 83.8, 81.7, 51.4, 48.1, 45.7, 31.2, 25.3, 23.0, 22.2, 22.0, 18.5, 13.7. HRMS (EI) ( $[\text{M}+\text{H}]^+$ ) Calcd for  $\text{C}_{18}\text{H}_{28}\text{N}$ : 258.2143, found 258.2139.

***N*-benzyl-2-methylundec-5-yn-4-amine (4i):**

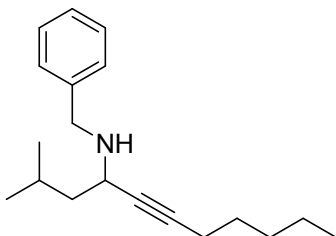

$^1\text{H}$  NMR (300 MHz,  $\text{CDCl}_3$ )  $\delta$  7.37-7.24 (m, 5H), 4.02 (d,  $J = 12.81$  Hz, 1H), 3.80 (d,  $J = 12.81$  Hz, 1H), 3.39 (m, 1H), 2.22 (m, 2H), 1.89 (m, 1H), 1.56-1.30 (m, 8H), 0.91 (m, 9H).  $^{13}\text{C}$  NMR (75.5 MHz,  $\text{CDCl}_3$ )  $\delta$  140.5, 128.4, 128.3, 126.9, 83.9, 81.7, 51.4, 48.1, 45.7, 31.1, 28.8, 25.2, 23.0, 18.7, 14.1. HRMS (EI) ( $[\text{M}+\text{H}]^+$ ) Calcd for  $\text{C}_{19}\text{H}_{30}\text{N}$ : 272.2300, found 272.2302.

***N*-(4-methoxybenzyl)-4-methyl-1-phenylpent-1-yn-3-amine (4j):**

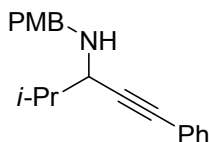

$^1\text{H}$  NMR ( $\text{CDCl}_3$ , 300 MHz):  $\delta$  7.45 (m, 2H), 7.30 (m, 4H), 6.86 (d,  $J = 8.6$  Hz, 2H), 4.04 (d,  $J = 12.8$  Hz, 1H), 3.86-3.77 (m, 4H), 3.39 (d,  $J = 5.53$  Hz, 1H), 1.93 (m, 1H), 1.72 (br, 1H), 1.06 (d,  $J = 6.87$  Hz, 6H).  $^{13}\text{C}$  NMR (75.5 MHz,  $\text{CDCl}_3$ ):  $\delta$  158.7, 132.3, 131.7, 129.6, 128.2, 127.8,

123.6, 113.8, 89.8, 84.7, 56.0, 55.2, 51.1, 32.9, 19.8, 18.0. HRMS (ESI) ( $[M]^+$ ) Calcd for  $C_{20}H_{23}NO$ : 293.1780, found 293.1780.

**4-Methyl-N-phenethyl-1-phenylpent-1-yn-3-amine (4k):**

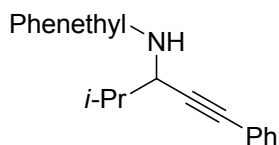

$^1H$  NMR ( $CDCl_3$ , 300 MHz):  $\delta$  7.40-7.19 (m, 10H), 3.44 (d,  $J = 5.3$  Hz, 1H), 3.24-3.16 (m, 1H), 2.97-2.76 (m, 3H), 1.91 (m, 1H), 1.50 (br, 1H), 1.20 (m, 6H).  $^{13}C$  NMR (75.5 MHz,  $CDCl_3$ ):  $\delta$  140.1, 131.7, 128.7, 128.4, 128.2, 126.1, 123.5, 89.6, 84.5, 57.1, 49.2, 36.4, 32.9, 19.9, 17.8. HRMS (ESI) ( $[M]^+$ ) Calcd for  $C_{20}H_{23}N$ : 277.1830, found 277.1827.

**1-Cyclohexyl-N-(3-methoxyphenethyl)-3-(4-methoxyphenyl)prop-2-yn-1-amine (4l):**

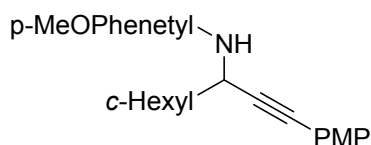

$^1H$  NMR ( $CDCl_3$ , 300 MHz):  $\delta$  7.33 (d,  $J = 8.6$  Hz, 2H), 7.20 (m, 1H), 6.94-6.73 (m, 5H), 3.85 (s, 1H), 3.79 (s, 3H), 3.77 (s, 3H), 3.41 (d,  $J = 5.6$  Hz, 1H), 3.24-3.15 (m, 1H), 2.96-2.72 (m, 3H), 1.85-1.54 (m, 7H), 1.28-1.11 (m, 5H).  $^{13}C$  NMR (75.5 MHz,  $CDCl_3$ ):  $\delta$  159.7, 159.2, 141.8, 133.0, 130.6, 129.4, 121.1, 115.7, 114.4, 113.8, 113.7, 111.5, 88.5, 84.3, 56.4, 55.3, 55.1, 49.0, 42.7, 36.4, 30.3, 28.6, 26.5, 26.3, 26.1. HRMS (ESI) ( $[M]^+$ ) Calcd for  $C_{25}H_{31}NO_2$ : 377.2355, found 377.2361.

**N-(1-(4-methoxyphenyl)-5-phenylpent-1-yn-3-yl)cyclobutanamine (4m):**

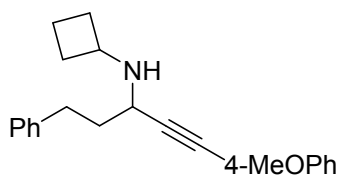

$^1H$  NMR ( $CDCl_3$ , 300 MHz):  $\delta$  7.36 (d,  $J = 8.6$  Hz, 2H), 7.30-7.11 (m, 5H), 6.8 (d,  $J = 8.6$  Hz, 2H), 3.80 (s, 3H), 3.58-3.48 (m, 1H), 2.97-2.68 (m, 3H), 2.44-2.16 (m, 2H), 2.04-1.60 (m, 5H).  $^{13}C$  NMR (75.5 MHz,  $CDCl_3$ ):  $\delta$  159.4, 141.7, 132.9, 128.5, 128.4, 125.9, 115.4, 113.9, 89.4, 83.7, 55.3, 52.7, 48.4, 37.8, 32.4, 32.1, 31.2, 15.3. HRMS (ESI) ( $[M]^+$ ) Calcd for  $C_{22}H_{25}NO$ : 319.1936, found 319.1939.

**N-(1-cyclohexyl-3-phenylprop-2-ynyl)cyclohexanamine (4n):**

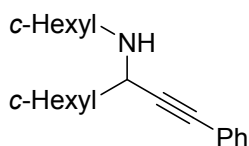

$^1\text{H}$  NMR ( $\text{CDCl}_3$ , 300 MHz):  $\delta$  7.42 (m, 2H), 7.29 (m, 3H), 3.52 (d,  $J = 5.4$  Hz, 1H), 2.84-2.75 (m, 1H), 2.0-1.54 (m, 11H), 1.40-0.95 (m, 11H).  $^{13}\text{C}$  NMR (75.5 MHz,  $\text{CDCl}_3$ ):  $\delta$  131.7, 128.2, 127.7, 123.8, 90.8, 84.0, 54.4, 52.9, 43.0, 34.5, 32.5, 30.5, 28.3, 26.6, 26.3, 26.2, 26.1, 25.2, 24.8. HRMS (ESI) ( $[\text{M}]^+$ ) Calcd for  $\text{C}_{21}\text{H}_{29}\text{N}$ : 295.2300, found 295.2301.

***N*-(1-cyclohexyl-3-phenylprop-2-ynyl)cyclooctanamine (4o):**

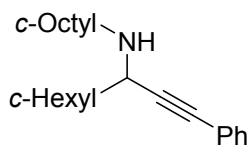

$^1\text{H}$  NMR ( $\text{CDCl}_3$ , 300 MHz):  $\delta$  7.40 (m, 2H), 7.28 (m, 3H), 3.46 (d,  $J = 5.4$  Hz, 1H), 3.1 (m, 1H), 1.87-0.85 (m, 34H).  $^{13}\text{C}$  NMR (75.5 MHz,  $\text{CDCl}_3$ ):  $\delta$  131, 128.2, 127.7, 123.8, 90.8, 84.0, 55.3, 53.5, 43.0, 34.5, 30.8, 30.5, 28.6, 27.6, 27.2, 26.6, 26.3, 26.1, 25.8, 24.3, 23.9. HRMS (ESI) ( $[\text{M}]^+$ ) Calcd for  $\text{C}_{23}\text{H}_{33}\text{N}$ : 323.2613, found 323.2616.

***N*-(1-cyclohexyl-3-(2-fluorophenyl)prop-2-ynyl)cyclohexanamine (4p)**

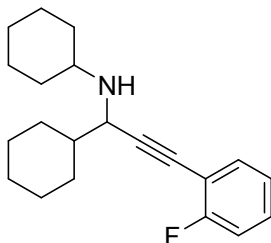

$^1\text{H}$  NMR (300 MHz,  $\text{CDCl}_3$ )  $\delta$  7.41 (m, 1H), 7.23 (m, 1H), 7.07 (m, 2H), 3.56 (d,  $J = 4.89$  Hz, 1H), 2.82 (m, 1H), 1.99-1.68 (m, 12H), 1.36-1.15 (m, 9H), 1.04 (m, 1H).  $^{13}\text{C}$  NMR (75.5 MHz,  $\text{CDCl}_3$ )  $\delta$  162.9 (d,  $J = 250.8$  Hz), 133.5, 129.4 (d,  $J = 7.7$  Hz), 123.8, 115.4 (d,  $J = 20.9$  Hz), 112.1 (d,  $J = 15.9$  Hz), 95.8, 95.7, 54.6, 53.1, 42.6, 34.2, 32.2, 30.5, 29.2, 28.1, 26.5, 26.3, 25.6, 25.2, 24.8. HRMS (EI) ( $[\text{M}+\text{H}]^+$ ) Calcd for  $\text{C}_{21}\text{H}_{29}\text{FN}$ : 314.2206, found 314.2209.

***N*-(1-*p*-tolyl-2-ynyl)cyclopentanamine (4q):**

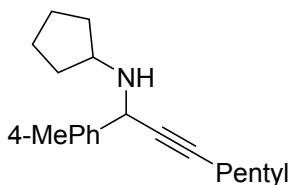

$^1\text{H}$  NMR ( $\text{CDCl}_3$ , 300 MHz):  $\delta$  7.41 (d,  $J = 7.9\text{Hz}$ , 2H), 7.14 (d,  $J = 7.7\text{Hz}$ , 2H), 4.60 (br, 1H), 3.32 (m, 1H), 2.44 (br, 1H), 2.32 (s, 3H), 2.30 (t,  $J = 6.3\text{ Hz}$ , 2H), 1.87-1.23 (m, 15H), 0.89 (t,  $J = 6.5\text{Hz}$ , 3H).  $^{13}\text{C}$  NMR (75.5 MHz,  $\text{CDCl}_3$ ):  $\delta$  129.9, 129.8, 129.1, 127.7, 85.9, 79.6, 57.1, 52.7, 32.9, 32.4, 31.1, 28.5, 24.1, 22.2, 21.1, 18.9, 14.0. HRMS (ESI) ( $[\text{M}]^+$ ) Calcd for  $\text{C}_{20}\text{H}_{29}\text{N}$ : 283.2300, found 283.2309.

***N*-(1-cyclohexyl-3-(4-pentylphenyl)prop-2-ynyl)cyclopentanamine (4r):**

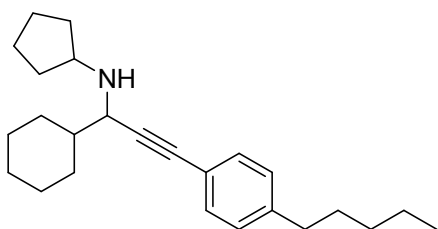

$^1\text{H}$  NMR (300 MHz,  $\text{CDCl}_3$ )  $\delta$  7.37 (m, 2H), 7.11 (m, 2H), 3.43 (m, 1H), 3.38 (d,  $J = 5.3\text{ Hz}$ , 1H), 1.92-1.52 (m, 13H), 1.40-1.19 (m, 12H), 0.88 (m, 3H).  $^{13}\text{C}$  NMR (75.5 MHz,  $\text{CDCl}_3$ )  $\delta$  142.8, 132.1, 131.6, 128.3, 120.9, 90.1, 84.1, 57.6, 55.0, 43.1, 35.8, 34.0, 32.6, 31.4, 31.0, 30.9, 30.5, 28.5, 26.6, 26.4, 26.2, 24.2, 22.6, 14.1. HRMS (EI) ( $[\text{M}+\text{H}]^+$ ) Calcd for  $\text{C}_{25}\text{H}_{38}\text{N}$ : 352.2926, found 352.2922.

***N*-(5-methyl-1-phenylhex-1-yn-3-yl)cyclododecanamine (4s):**

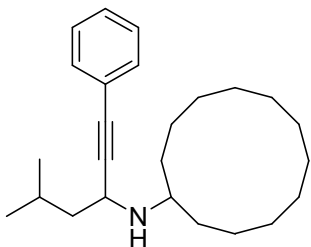

$^1\text{H}$  NMR (300 MHz,  $\text{CDCl}_3$ )  $\delta$  7.39 (d,  $J = 3.51$ , 2H), 7.38–7.26 (m, 3H), 3.69 (t,  $J = 6.78\text{ Hz}$ , 1H), 3.09 (bs, 1H), 2.01–1.92 (m, 1H), 1.71–1.64 (m, 1H), 1.58–1.52 (m, 2H), 1.43–1.30 (m, 24H), 0.95 (q,  $J = 3.39, 6.78\text{ Hz}$ , 6H).  $^{13}\text{C}$  NMR (300 MHz,  $\text{CDCl}_3$ ):  $\delta$  131.5, 128.1, 127.7, 123.6, 92.0, 83.2, 51.6, 46.5, 45.8, 30.2, 29.2, 25.3, 24.6, 24.6, 24.1, 23.9, 23.8, 23.1, 22.7, 22.4, 22.1, 21.6, 20.5. HRMS (ESI) ( $[\text{M}]^+$ ) Calcd for  $\text{C}_{25}\text{H}_{39}\text{N}$ : 353.3083, found 353.3099.

***N*-(5-methyl-1-phenylhex-1-yn-3-yl)cycloheptanamine (4t):**



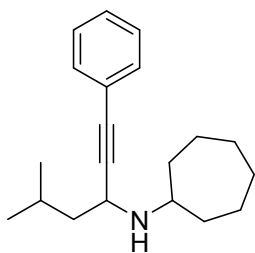

$^1\text{H}$  NMR (300 MHz,  $\text{CDCl}_3$ )  $\delta$  7.42–7.39 (m, 2H), 7.30–7.27 (m, 3H), 3.67 (t,  $J = 6.99$  Hz, 1H), 3.09–3.06 (m, 1H), 2.01–1.94 (m, 1H), 1.89–1.79 (m, 3H), 1.54–1.36 (m, 12H), 0.95 (q,  $J = 3.57, 6.6, 6.6$  Hz, 6H).  $^{13}\text{C}$  NMR (300 MHz,  $\text{CDCl}_3$ ):  $\delta$  131.6, 128.2, 127.7, 123.6, 91.7, 83.2, 56.3, 46.3, 45.9, 36.6, 33.2, 28.4, 28.1, 25.3, 24.6, 24.1, 23.1, 22.1. HRMS (ESI) ( $[\text{M}]^+$ ) Calcd for  $\text{C}_{21}\text{H}_{31}\text{N}$ : 283.2300, found 283.2303.

***N*-(1-Phenyl-oct-1-yn-3-yl)cyclooctanamine (4u):**

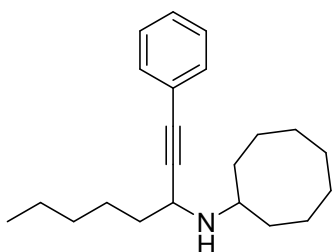

$^1\text{H}$  NMR (300 MHz,  $\text{CDCl}_3$ )  $\delta$  7.30 (m, 2H), 7.28 (m, 3H), 3.64 (m, 1H), 3.12 (m, 1H), 1.83–1.21 (m, 22H), 0.90 (t,  $J = 6.7$  Hz, 3H).  $^{13}\text{C}$  NMR (75 MHz,  $\text{CDCl}_3$ )  $\delta$  131.7, 128.2, 127.8, 123.7, 91.7, 83.4, 55.1, 48.0, 36.6, 34.5, 31.7, 30.9, 27.6, 27.2, 26.0, 25.9, 24.3, 24.0, 22.6, 14.1. HRMS (ESI) ( $[\text{M}]^+$ )  $\text{C}_{22}\text{H}_{33}\text{N}$ , calcd 311.2613, found: 311.2622.

***<sup>1</sup>H NMR and <sup>13</sup>C NMR spectra***

***<sup>1</sup>H NMR of *N*-(2-methoxyethyl)-1-(4-propylphenyl)undec-1-yn-3-amine (4a):***

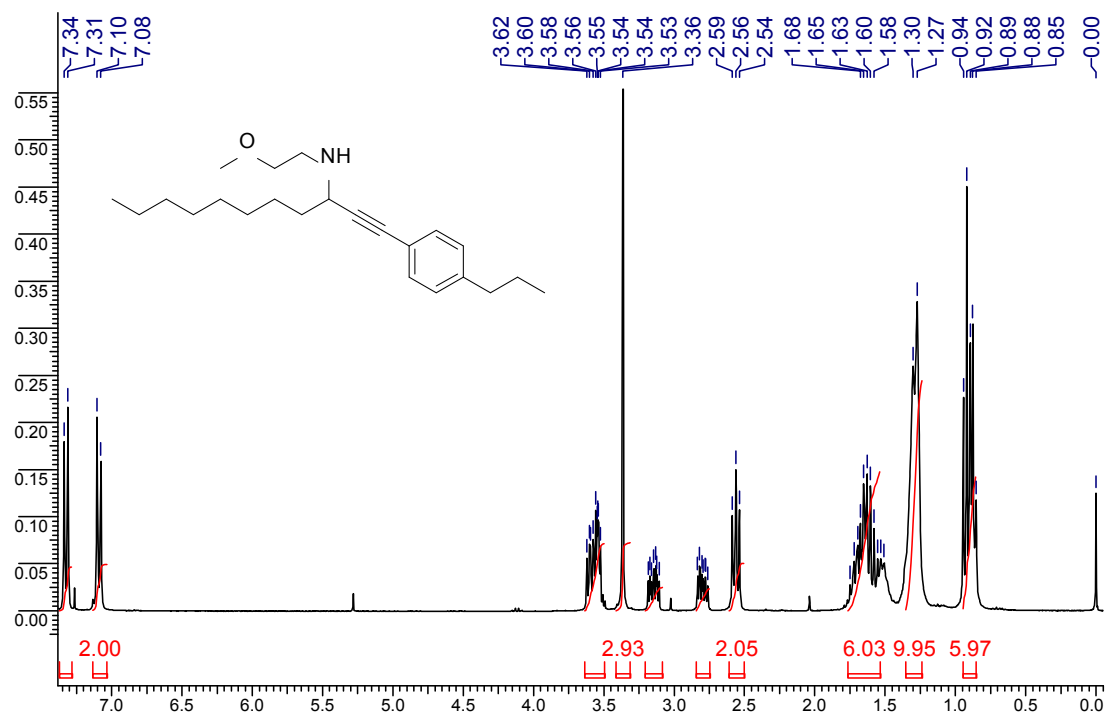

***<sup>13</sup>C NMR of *N*-(2-methoxyethyl)-1-(4-propylphenyl)undec-1-yn-3-amine (4a):***

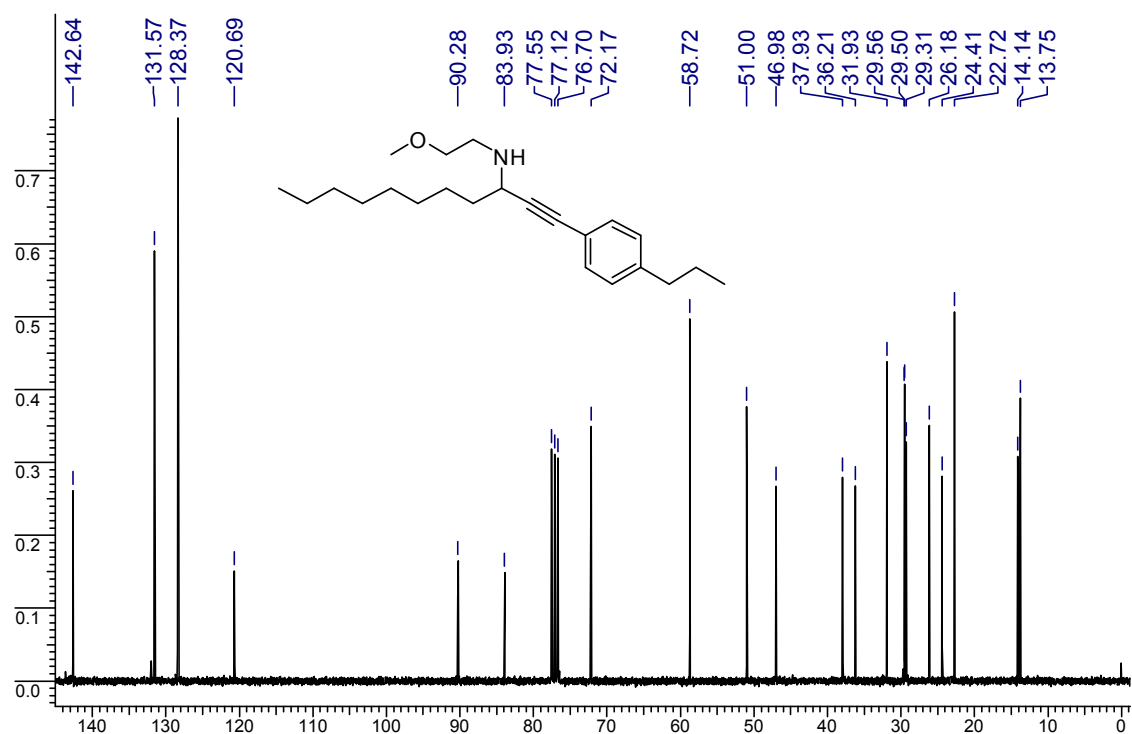

**<sup>1</sup>H NMR of 1-(4-Fluorophenyl)-*N*-isobutyl-4-methylpent-1-yn-3-amine(4b):**

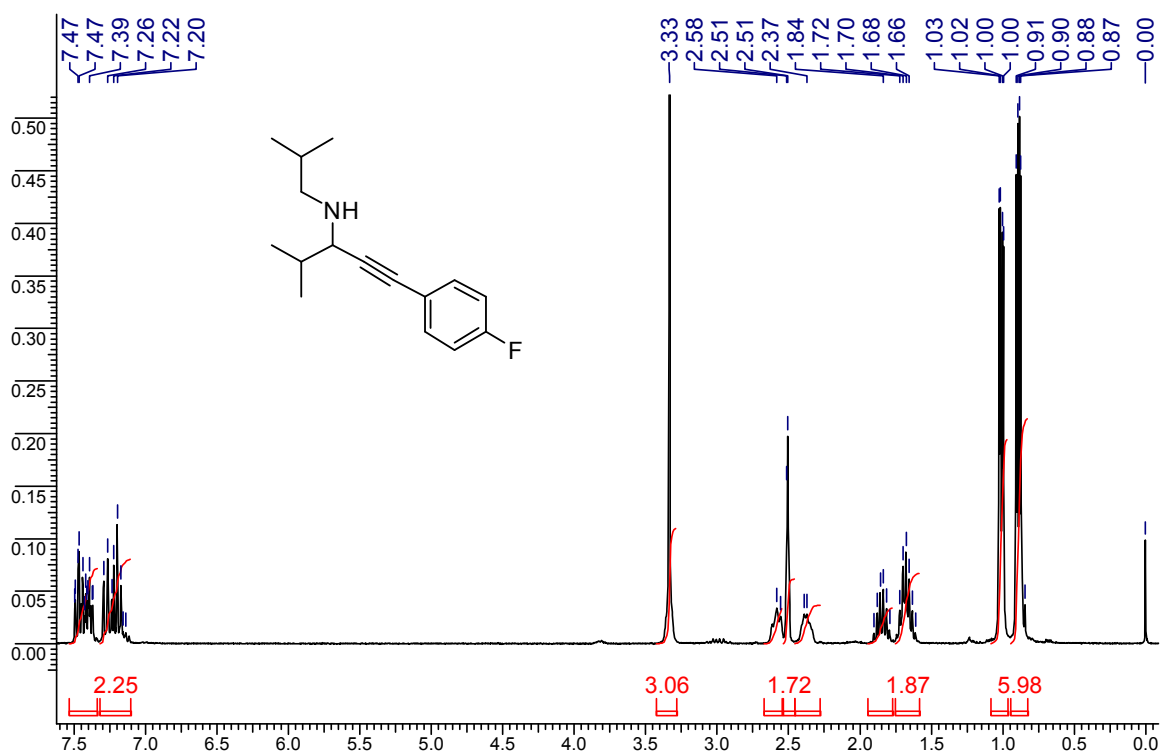

**<sup>13</sup>C NMR of 1-(4-Fluorophenyl)-*N*-isobutyl-4-methylpent-1-yn-3-amine (4b):**

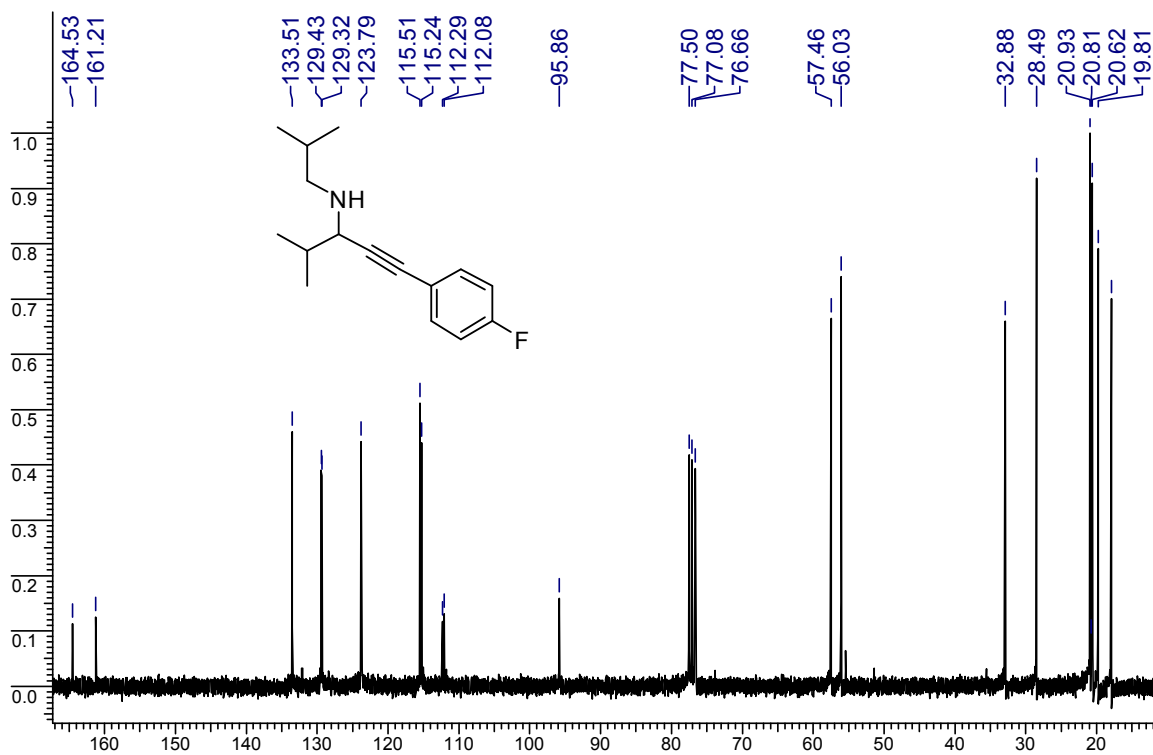

### <sup>1</sup>H NMR of 1-(4-Fluorophenyl)-N-pentyl-3-yn-1-amine (4c)

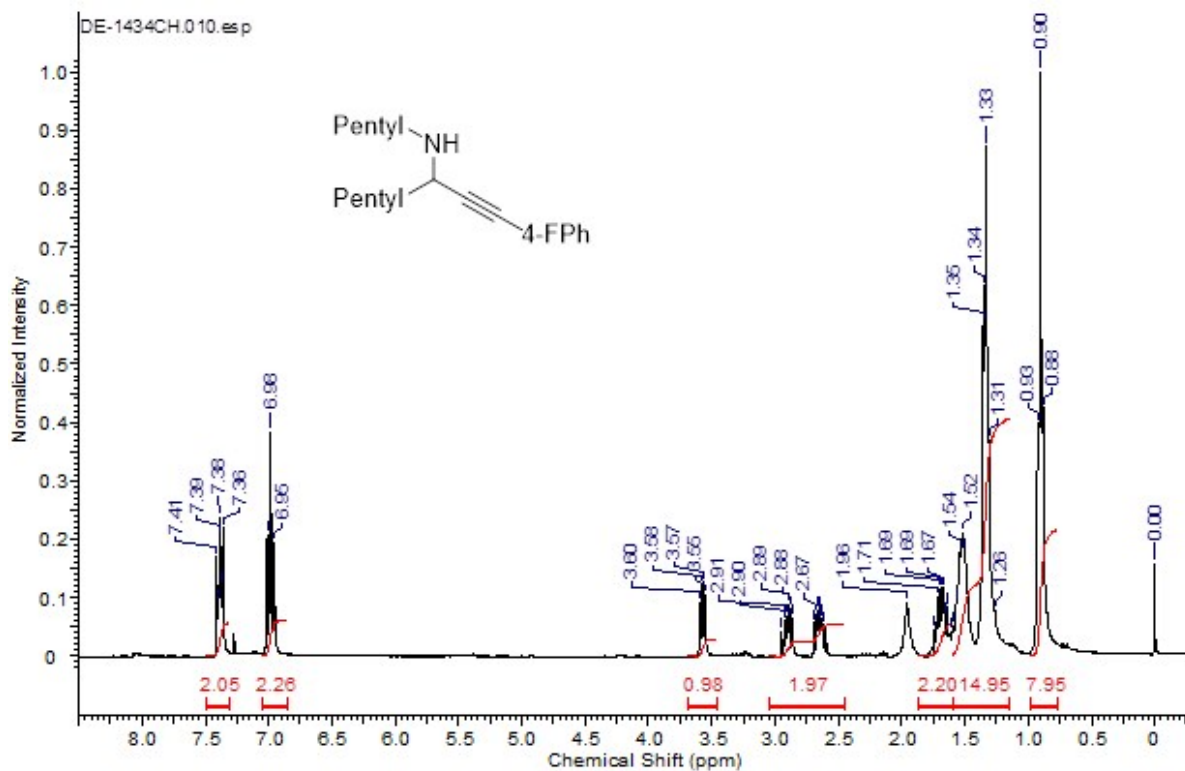

### <sup>13</sup>C NMR of 1-(4-Fluorophenyl)-N-pentyl-3-yn-1-amine (4c)

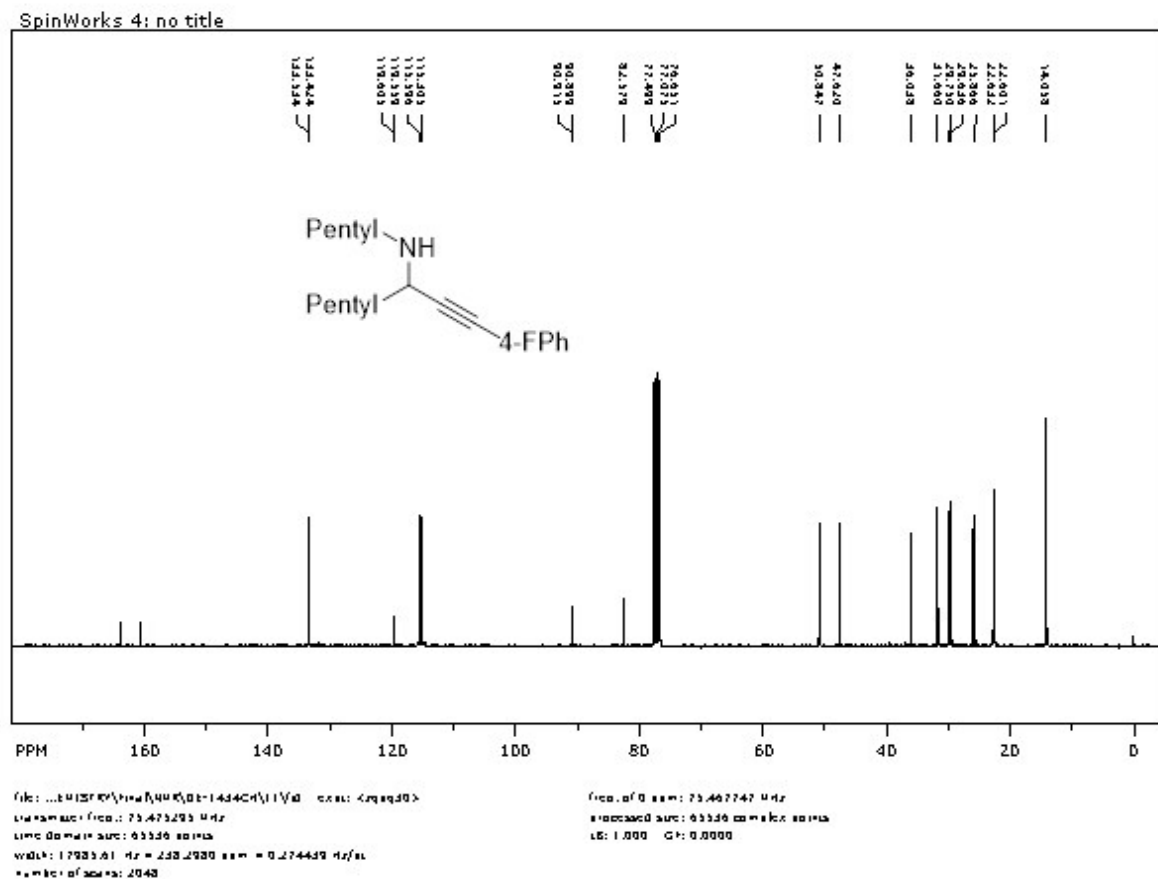

# <sup>1</sup>H and <sup>13</sup>C NMR of *N*-Benzyl-4-methyl-1-phenylpent-1-yn-3-amine (4d)

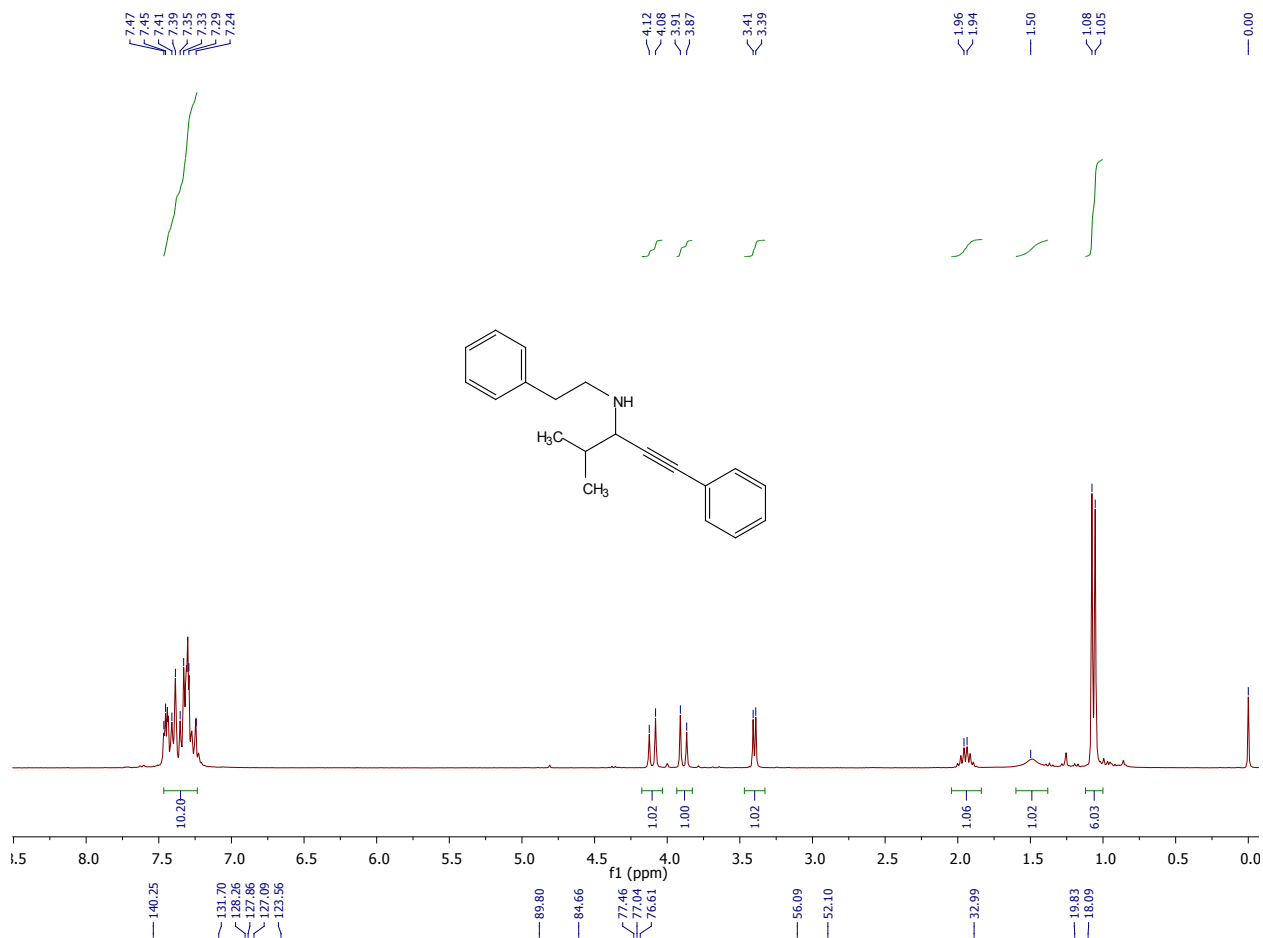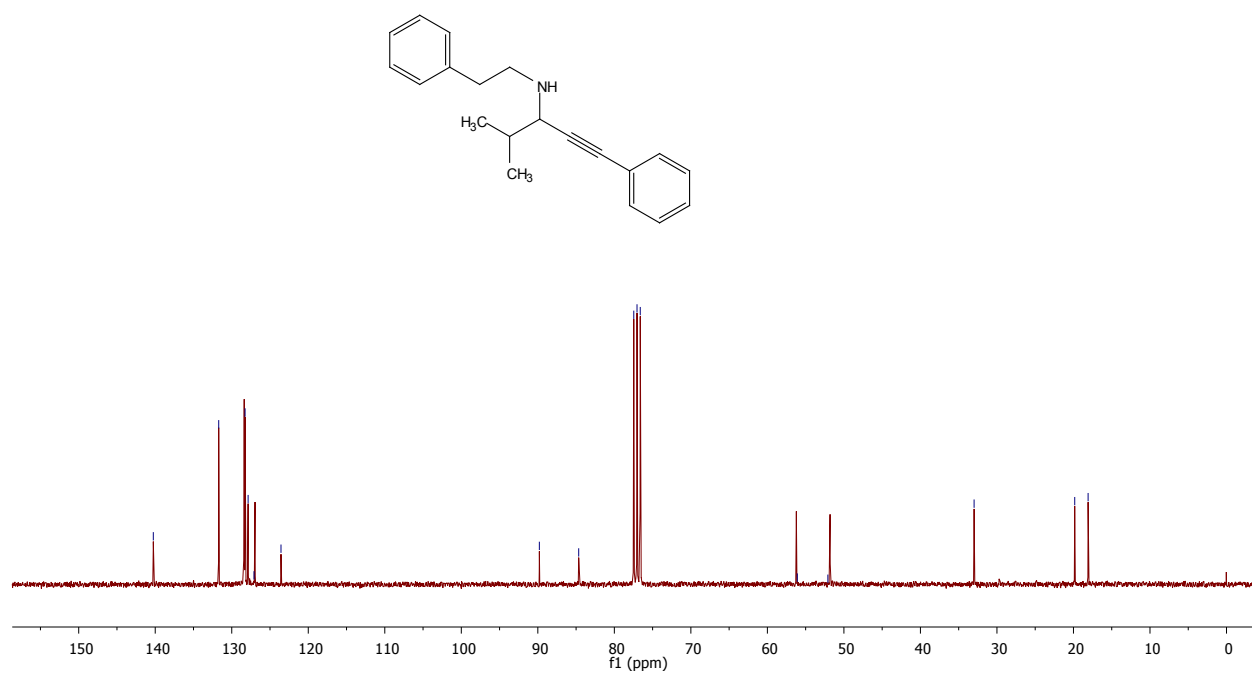

# $^1\text{H}$ and $^{13}\text{C}$ NMR of *N*-*tert*-butyl-5-methyl-1-phenylhex-1-yn-3-amine (4e)

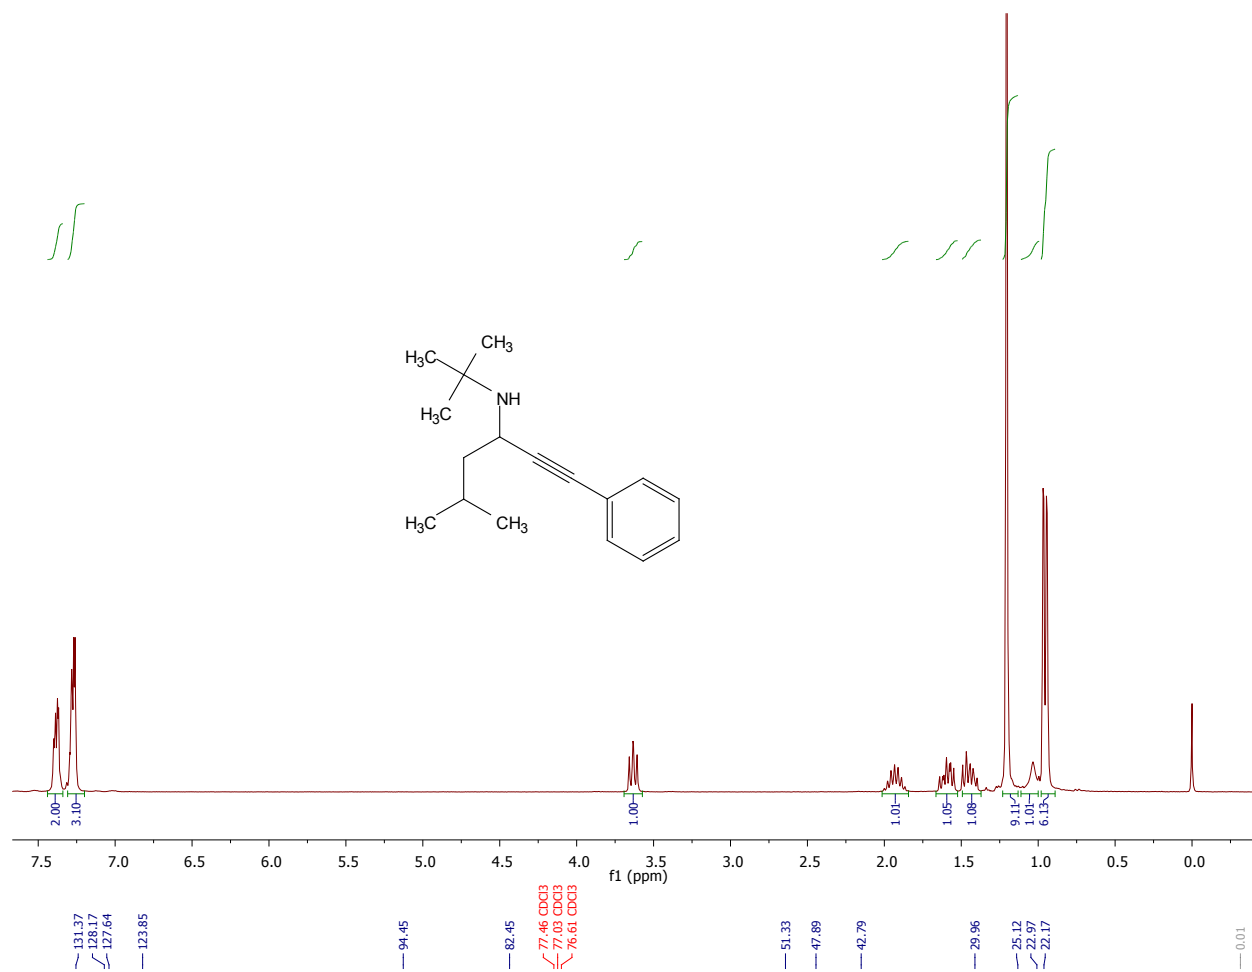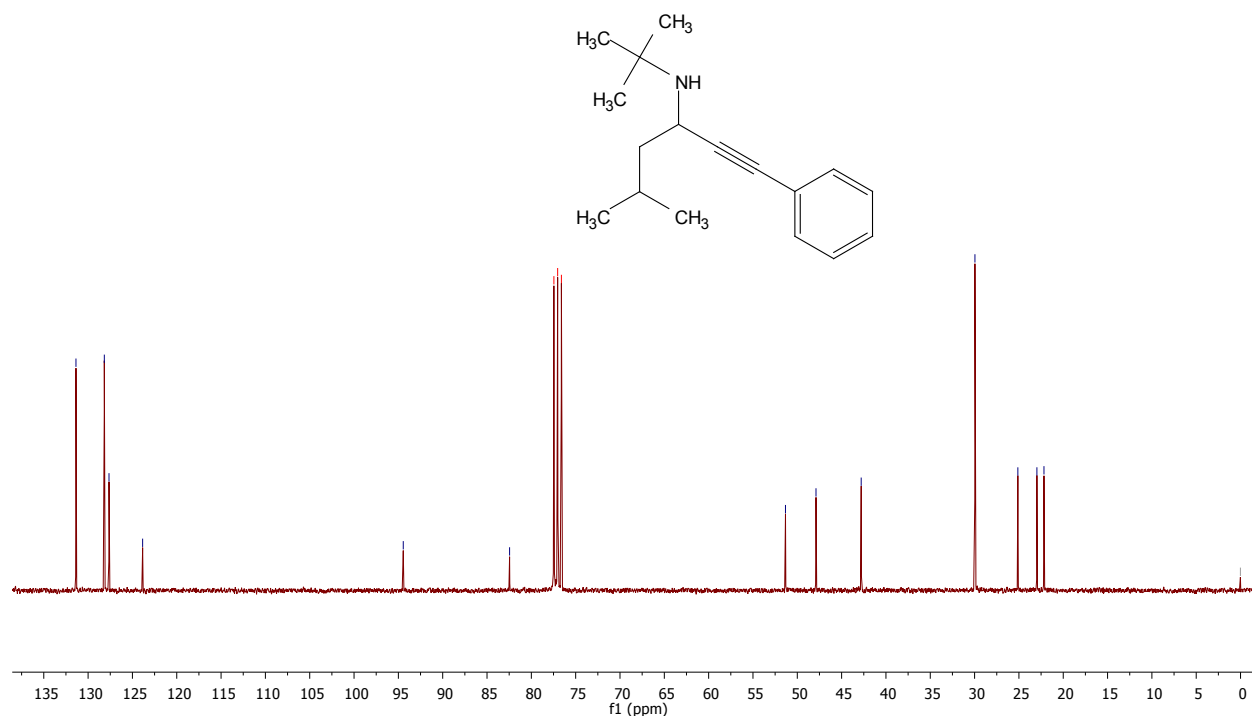

# <sup>1</sup>H and <sup>13</sup>C NMR of 1-(4-Butylphenyl)-5-methyl-N-phenethylhex-1-yn-3-amine (4g)

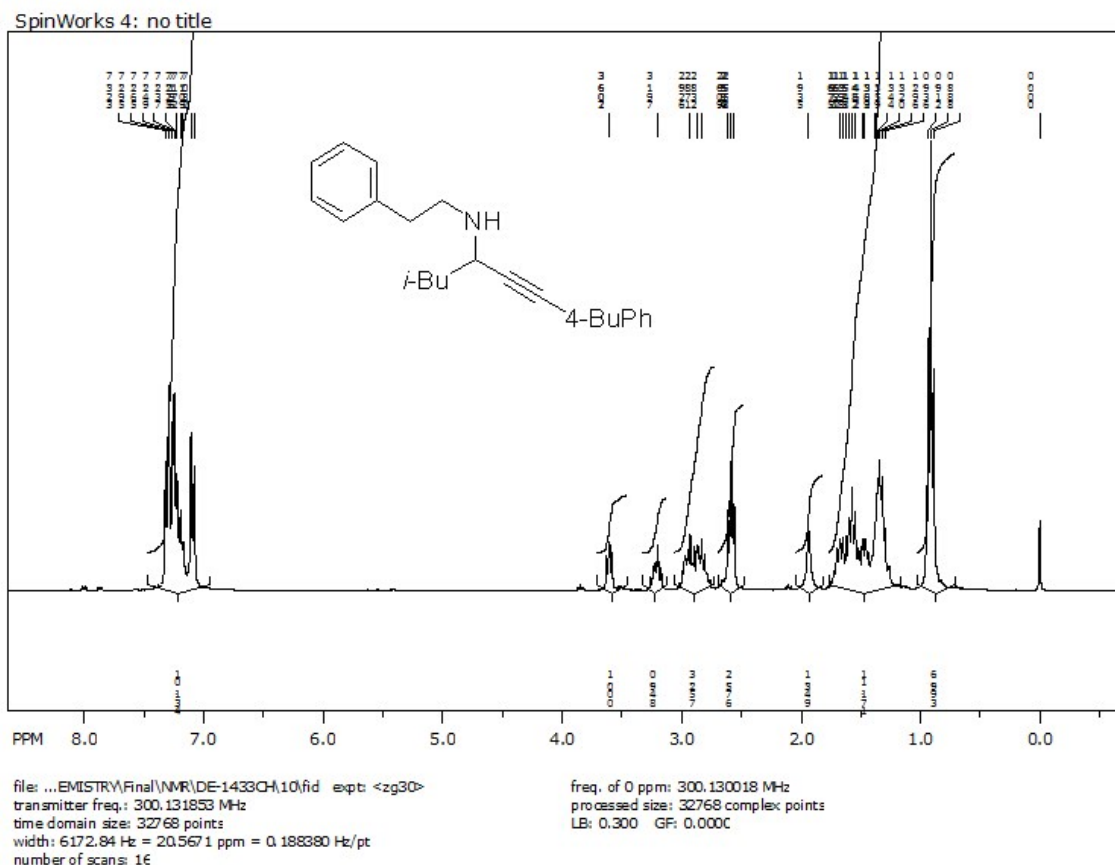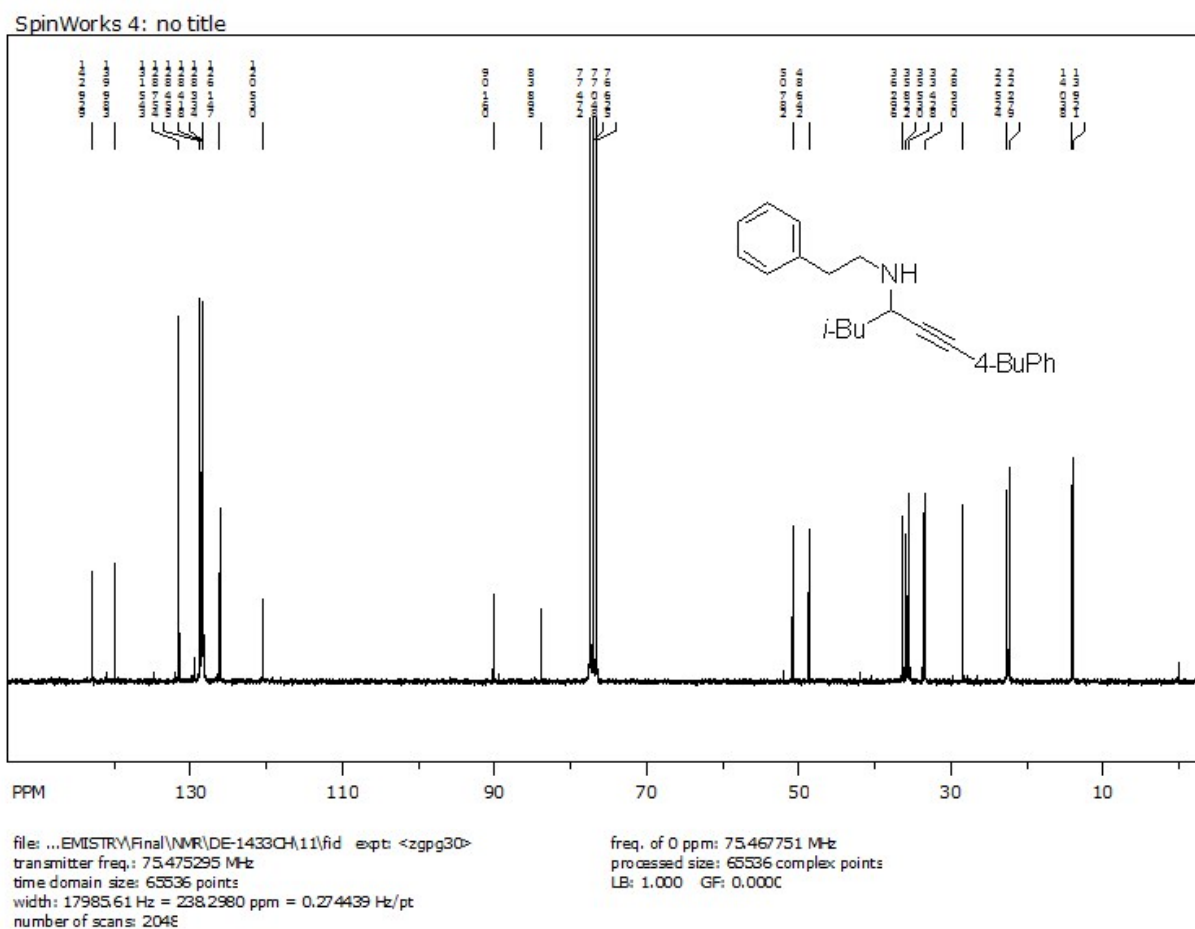

**<sup>1</sup>H NMR of *N*-(1-(4-hexylphenyl)hex-1-yn-3-yl)heptan-1-amine (4f)**

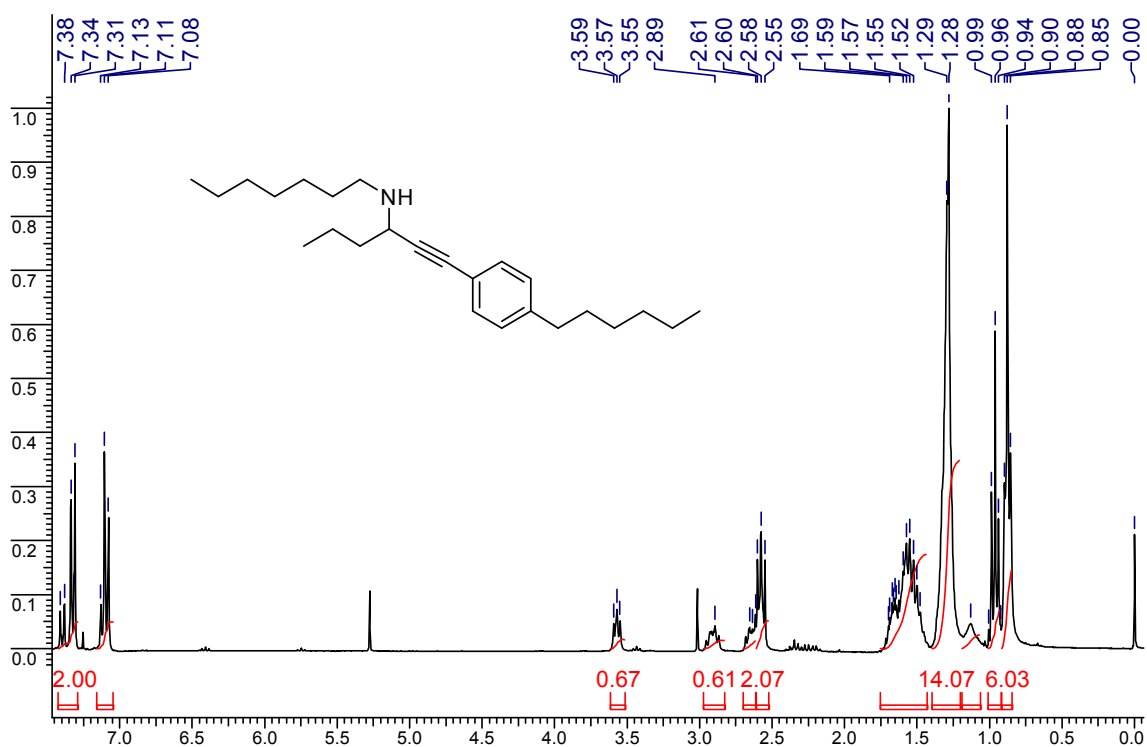

**<sup>13</sup>C NMR of *N*-(1-(4-hexylphenyl)hex-1-yn-3-yl)heptan-1-amine (4g)**

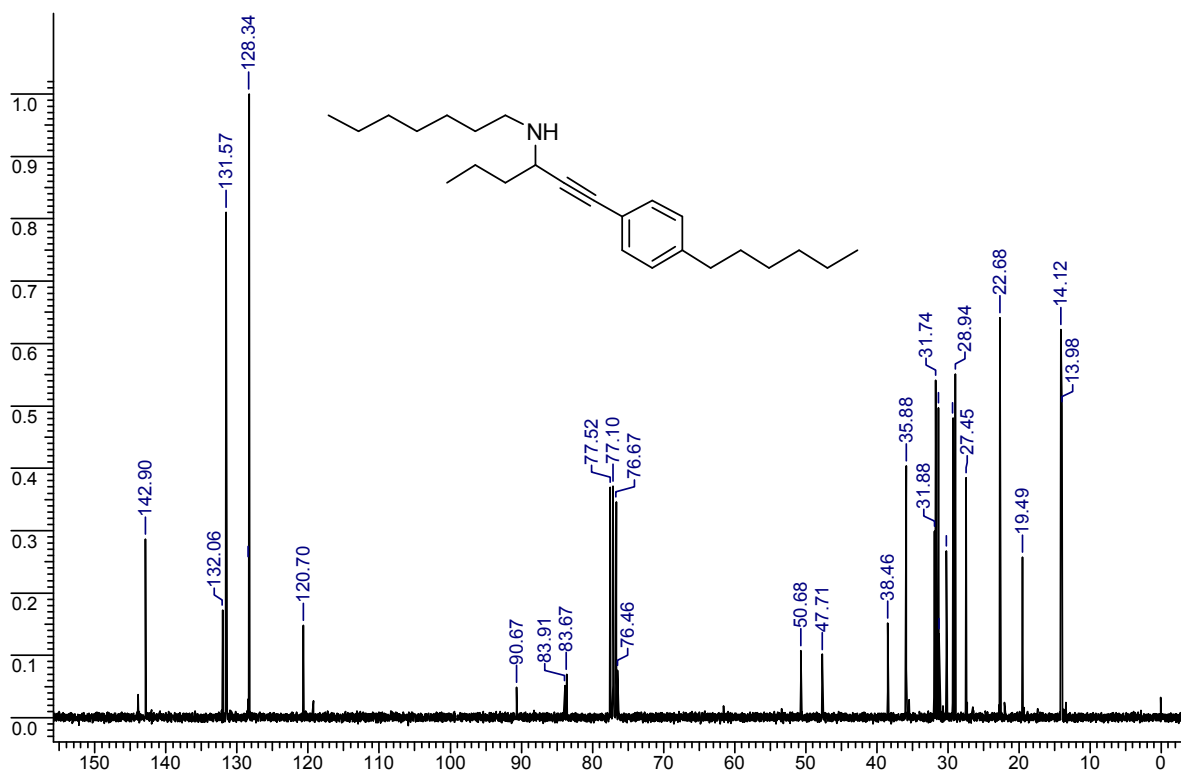



**<sup>1</sup>H NMR of *N*-benzyl-2-methyldec-5-yn-4-amine (4h):**

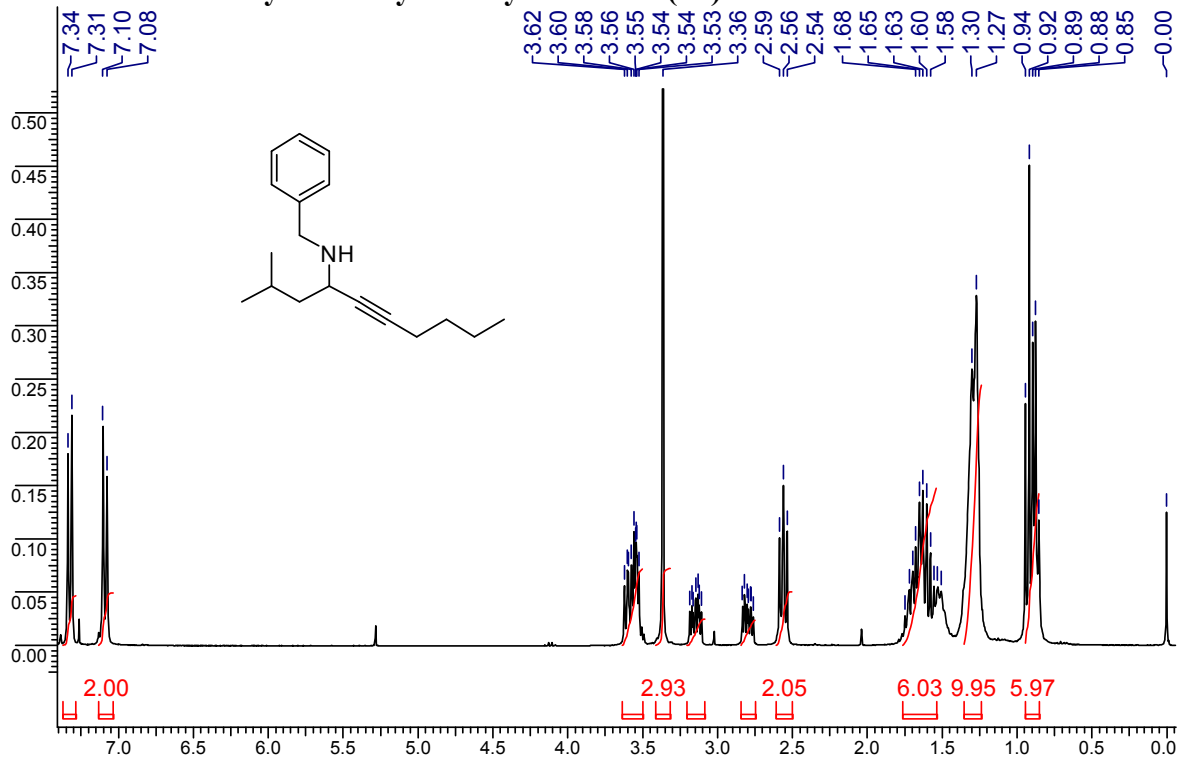

**<sup>13</sup>C NMR of *N*-benzyl-2-methyldec-5-yn-4-amine (4h):**

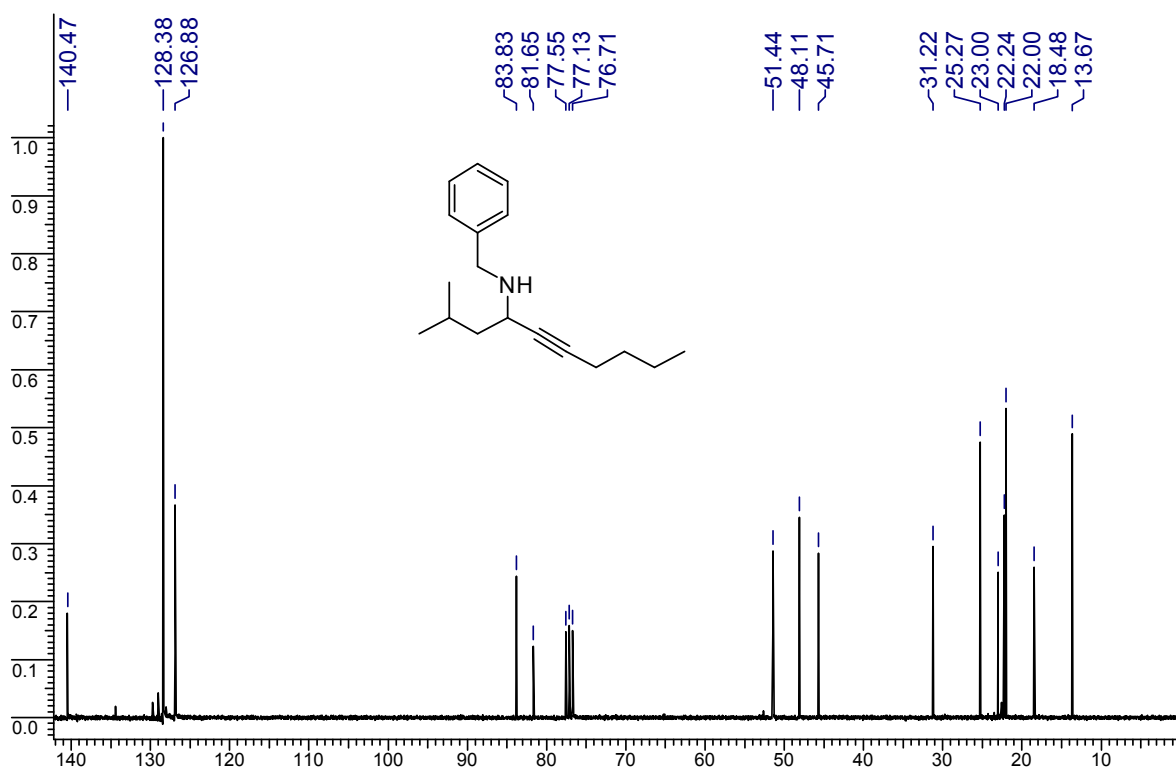

**<sup>1</sup>H NMR of *N*-benzyl-2-methylundec-5-yn-4-amine (4i)**

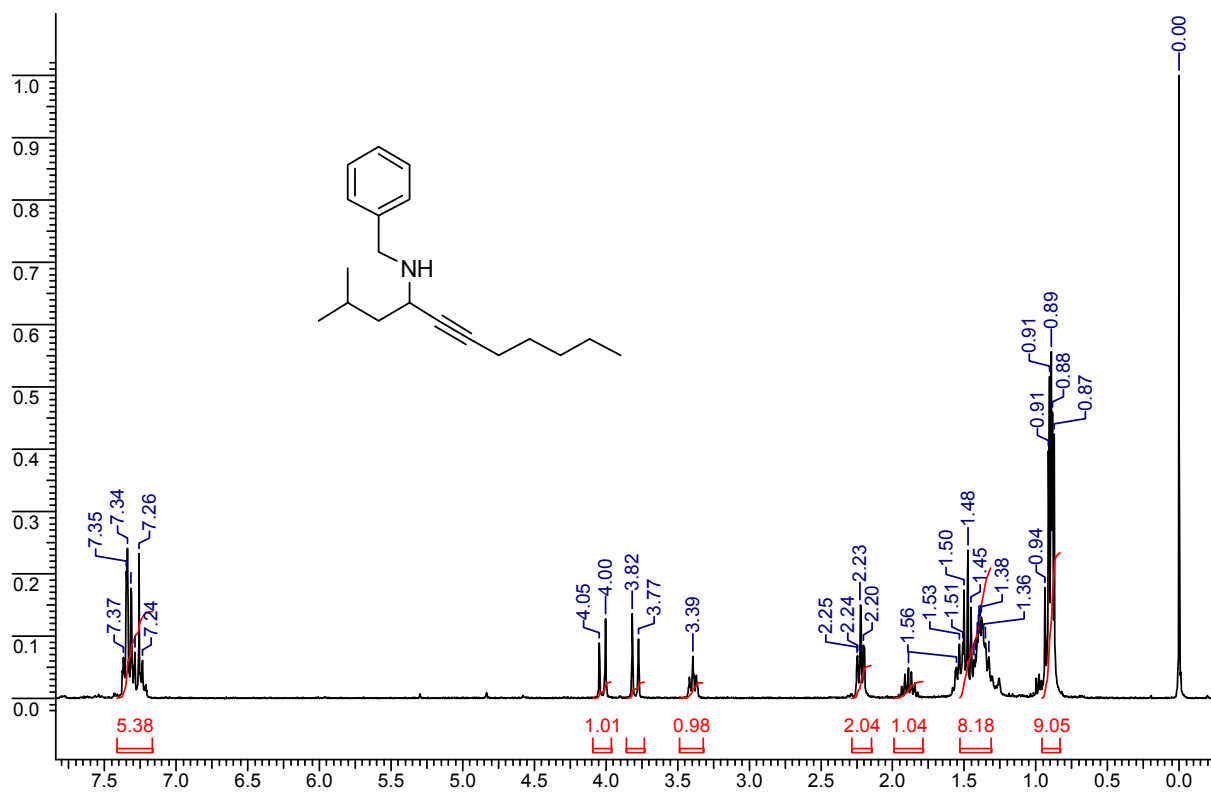

**<sup>13</sup>C NMR of *N*-benzyl-2-methylundec-5-yn-4-amine (4i)**

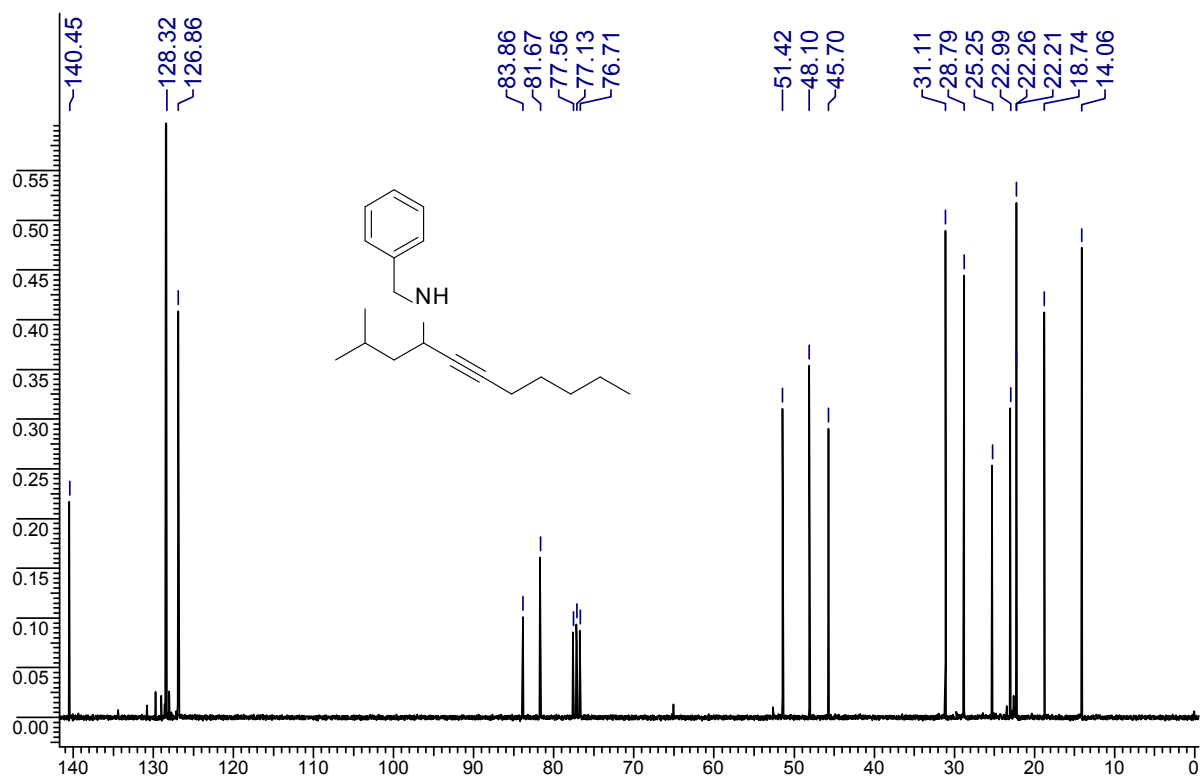



**<sup>1</sup>H NMR and <sup>13</sup>C of 4-methyl-N-phenethyl-1-phenylpent-1-yn-3-amine (4k)**

SpinWorks 4: no title

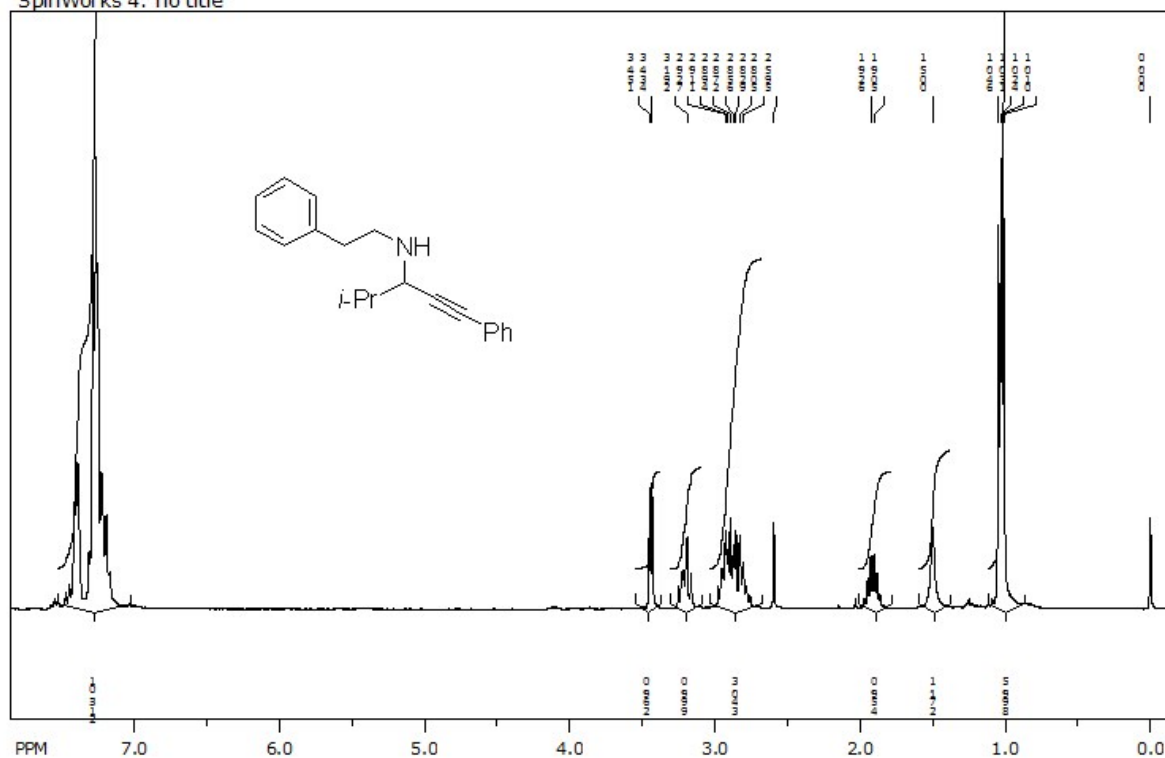

file: ...EMISTRY\Final\NMR\DE-1452CH\10\fid exp: <zg30>  
 transmitter freq.: 300.131853 MHz  
 time domain size: 32768 points  
 width: 6172.84 Hz = 20.5671 ppm = 0.188380 Hz/pt

freq. of 0 ppm: 300.130018 MHz  
 processed size: 32768 complex points  
 LB: 0.300 GF: 0.000C

SpinWorks 4: no title

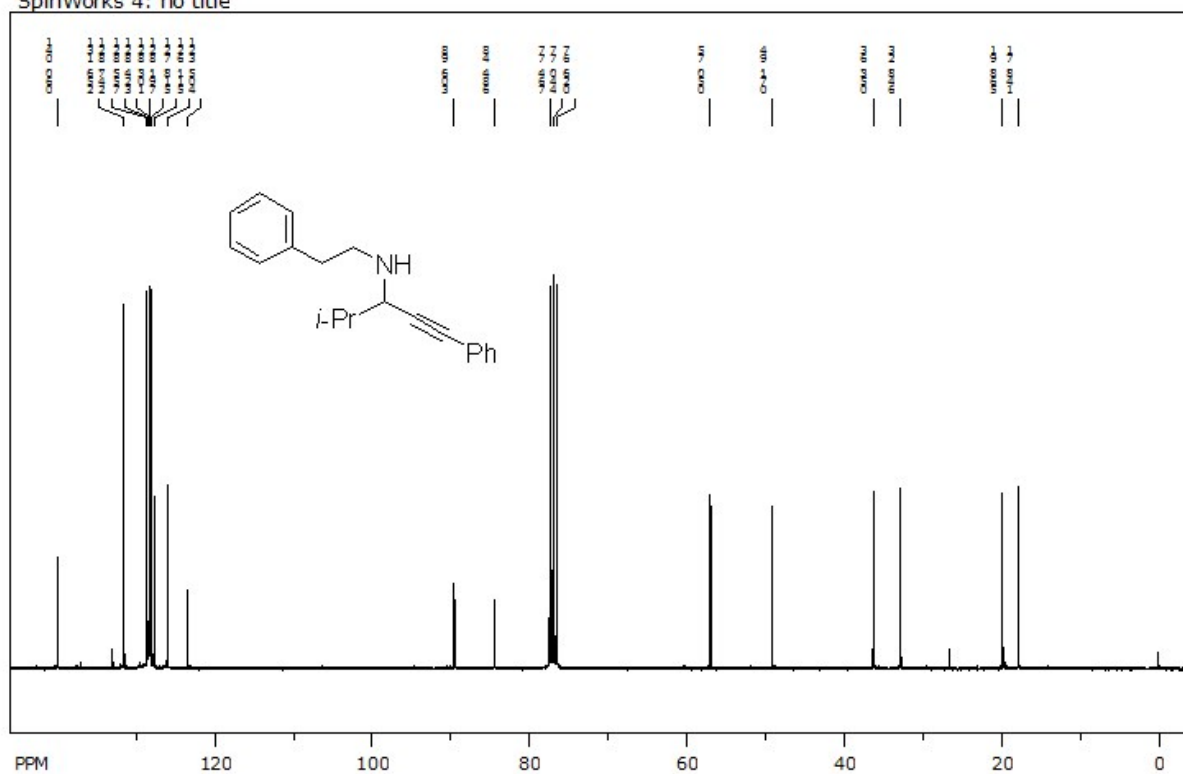

file: ...EMISTRY\Final\NMR\DE-1452CH\11\fid exp: <zgpg30>  
 transmitter freq.: 75.475295 MHz  
 time domain size: 65536 points  
 width: 17985.61 Hz = 238.2980 ppm = 0.274439 Hz/pt  
 number of scans: 3072

freq. of 0 ppm: 75.467753 MHz  
 processed size: 65536 complex points  
 LB: 1.000 GF: 0.000C

**<sup>1</sup>H NMR and <sup>13</sup>C of 1-Cyclohexyl-N-(3-methoxyphenethyl)-3-(4-methoxyphenyl)prop-2-yn-1-amine (4l)**

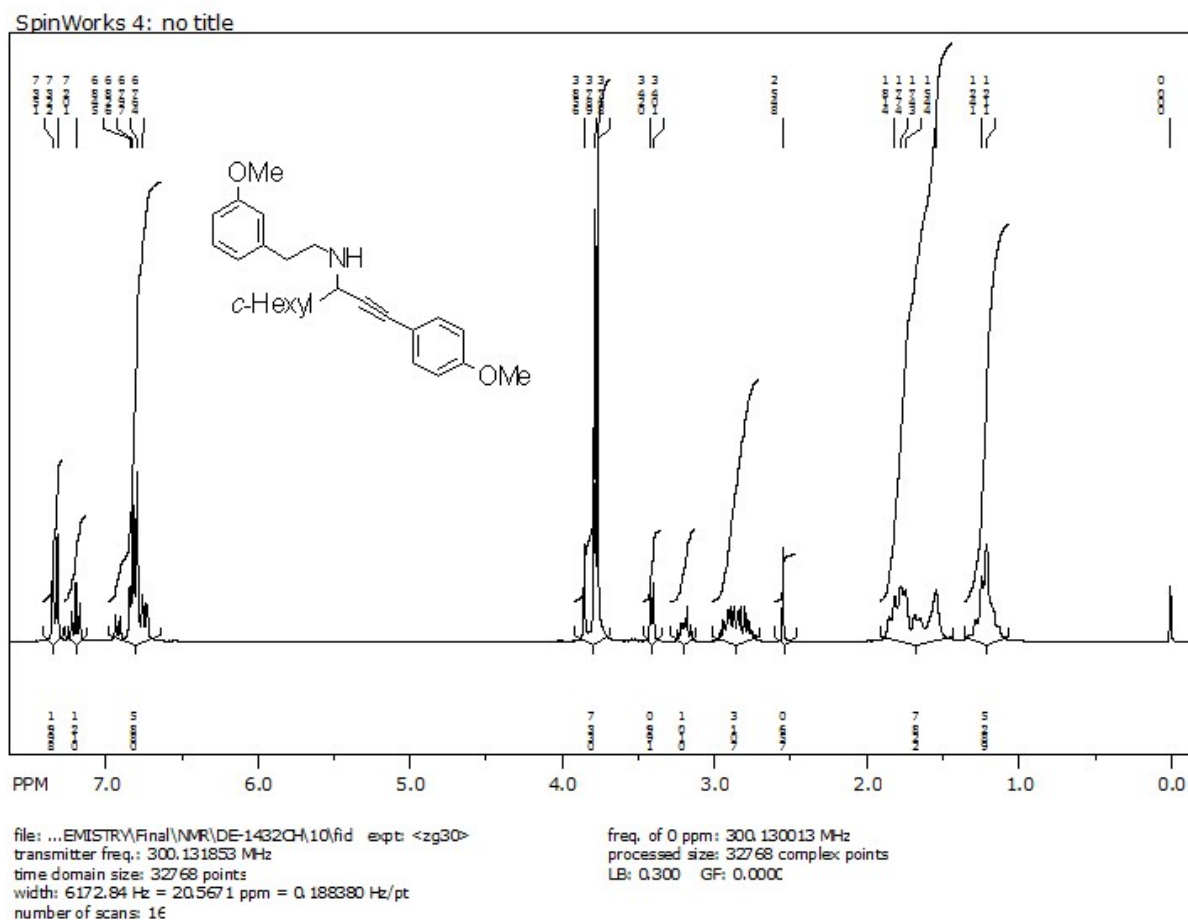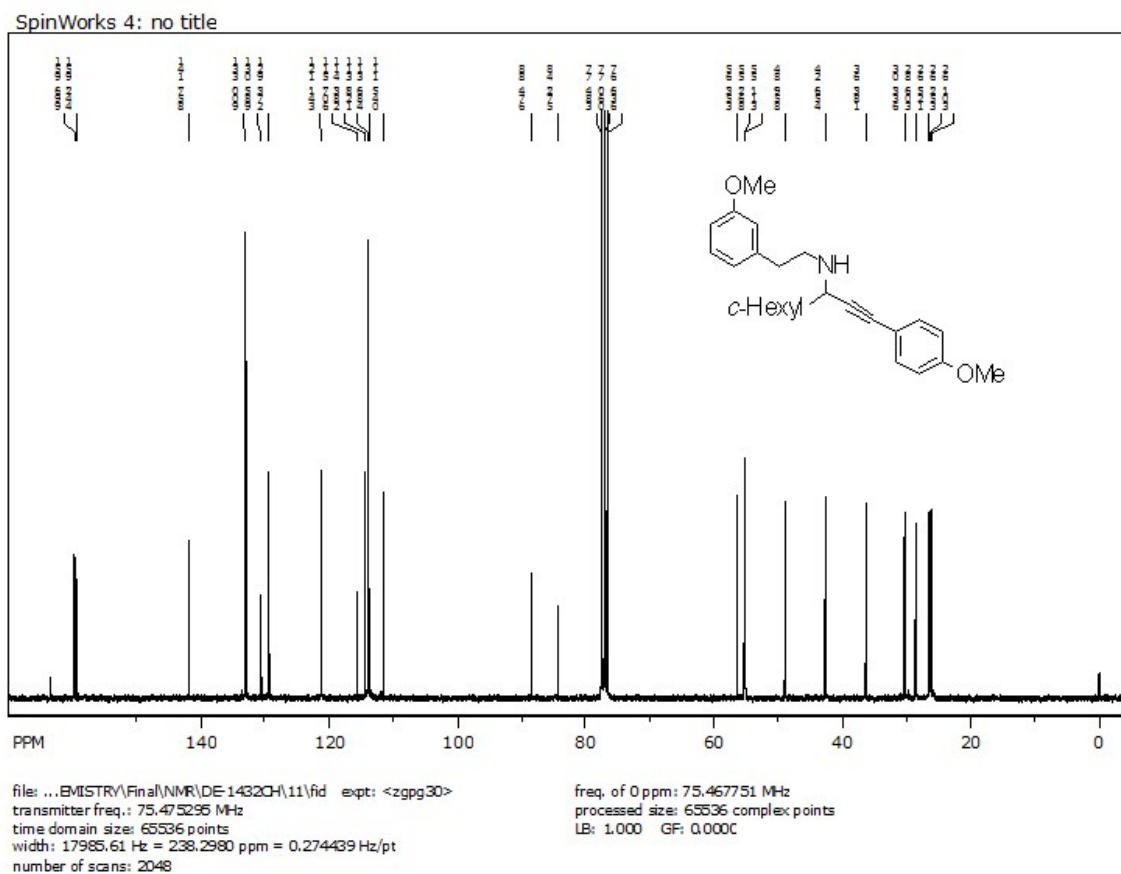

**<sup>1</sup>H NMR and <sup>13</sup>C of *N*-(1-(4-methoxyphenyl)-5-phenylpent-1-yn-3-yl)cyclobutanamine (4m)**

SpinWorks 4: no title

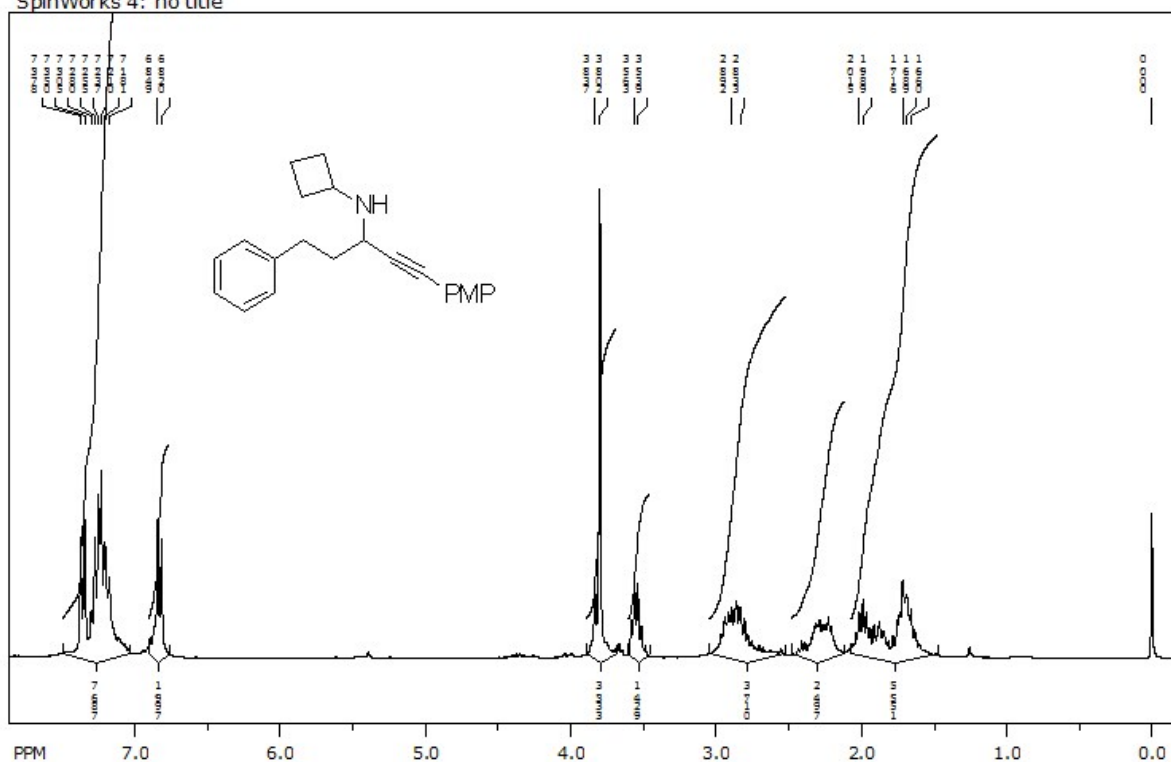

file: ...EMISTRY\Final\NMR\DE-1453CH\10\fid exp: <zg30>  
 transmitter freq.: 300.131853 MHz  
 time domain size: 32768 points  
 width: 6172.84 Hz = 20.5671 ppm = 0.188380 Hz/pt

freq. of 0 ppm: 300.130013 MHz  
 processed size: 32768 complex points  
 LB: 0.300 GF: 0.000C

SpinWorks 4: no title

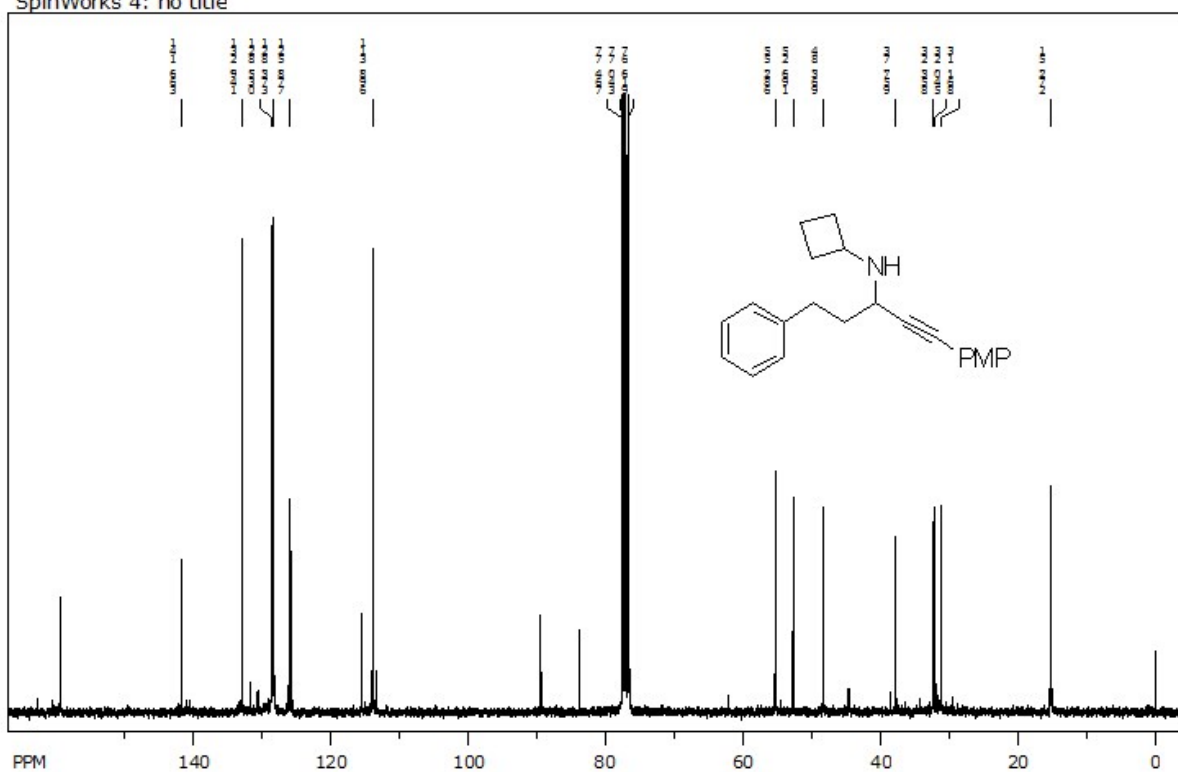

file: ...EMISTRY\Final\NMR\DE-1453CH\11\fid exp: <zgpg30>  
 transmitter freq.: 75.475295 MHz  
 time domain size: 65536 points  
 width: 17985.61 Hz = 238.2980 ppm = 0.274439 Hz/pt  
 number of scans: 3072

freq. of 0 ppm: 75.467751 MHz  
 processed size: 65536 complex points  
 LB: 1.000 GF: 0.000C

# <sup>1</sup>H NMR and <sup>13</sup>C of *N*-(1-cyclohexyl-3-phenylprop-2-ynyl)cyclohexanamine (4n)

SpinWorks 4: no title

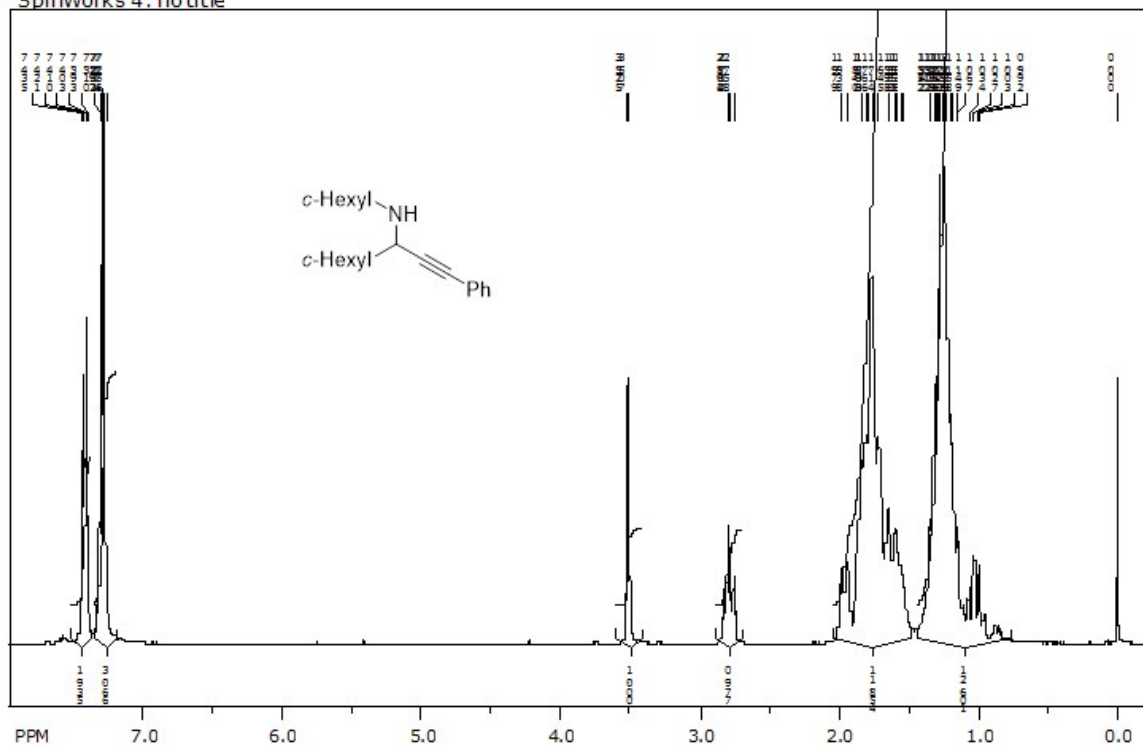

file: ...MISTRY\Final\NMR\DE-1425-ch\10\fid exp: <zg30>  
transmitter freq.: 300.131853 MHz  
time domain size: 32768 points  
width: 6172.84 Hz = 20.5671 ppm = 0.188380 Hz/pt  
number of scans: 16

freq. of 0 ppm: 300.130010 MHz  
processed size: 32768 complex points  
LB: 0.300 GF: 0.0000

SpinWorks 4: no title

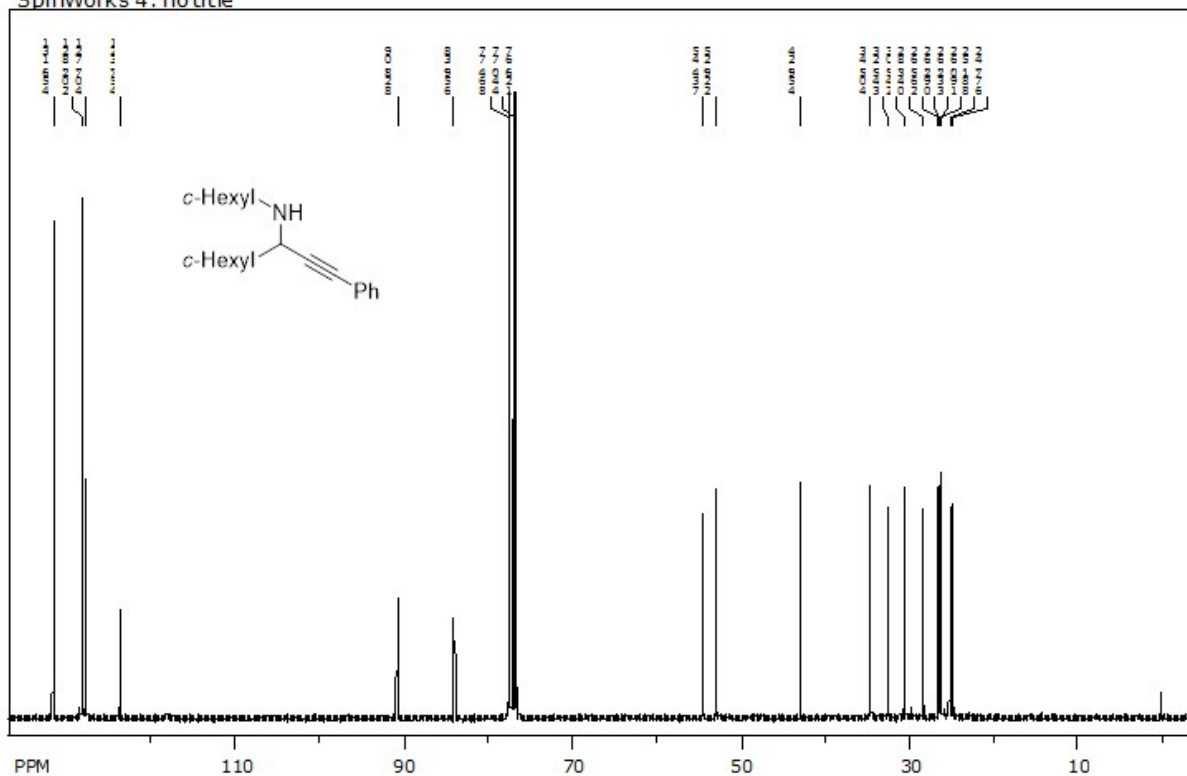

file: ...MISTRY\Final\NMR\DE-1425-ch\11\fid exp: <zgpg30>  
transmitter freq.: 75.475295 MHz  
time domain size: 65536 points  
width: 17985.61 Hz = 238.2980 ppm = 0.274439 Hz/pt  
number of scans: 2048

freq. of 0 ppm: 75.467750 MHz  
processed size: 65536 complex points  
LB: 1.000 GF: 0.0000

<sup>1</sup>H NMR and <sup>13</sup>C of *N*-(1-cyclohexyl-3-phenylprop-2-ynyl)cyclooctanamine (4o)

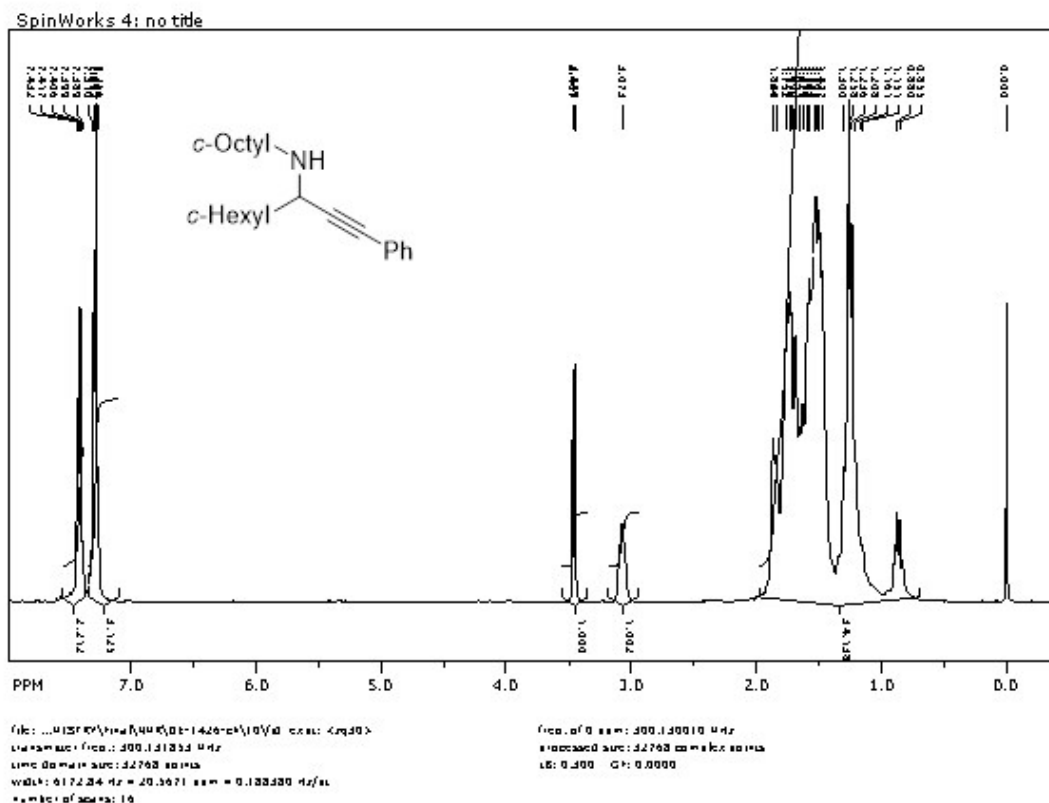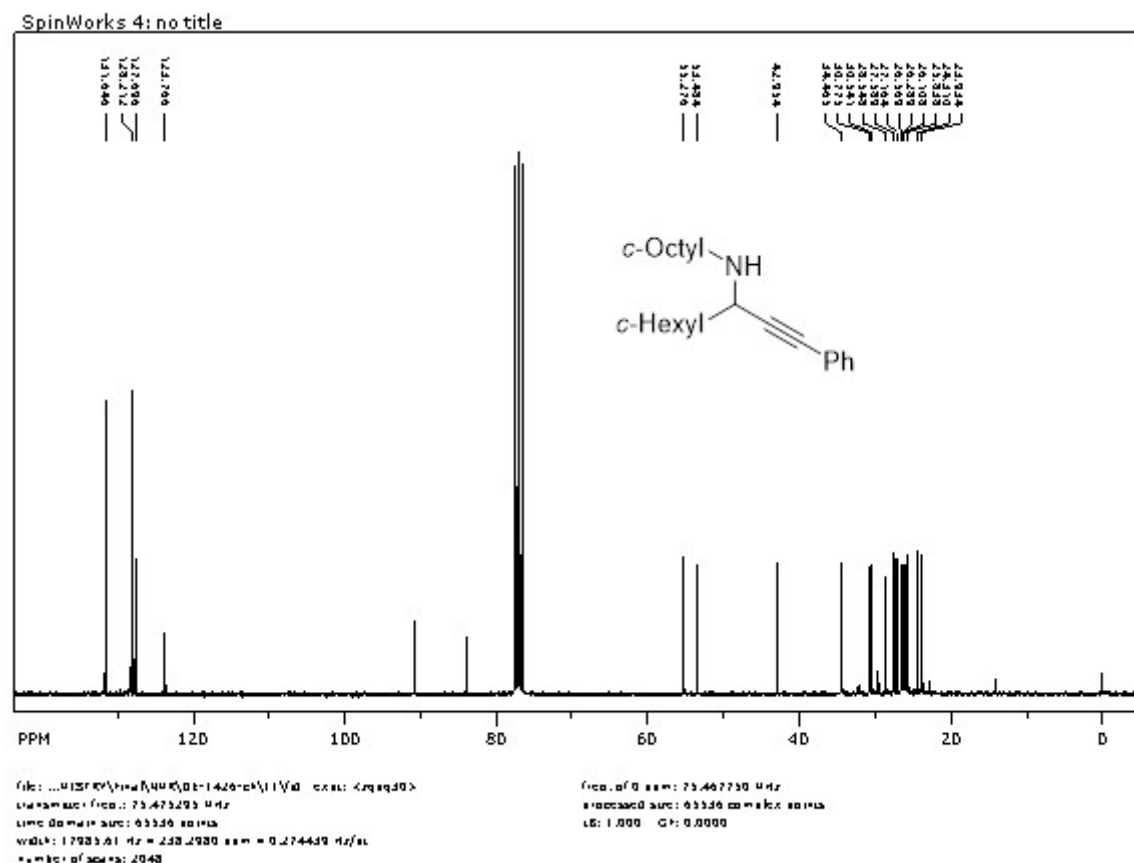



**<sup>1</sup>H NMR of *N*-(1-cyclohexyl-3-(2-fluorophenyl)prop-2-ynyl)cyclohexanamine (4p)**

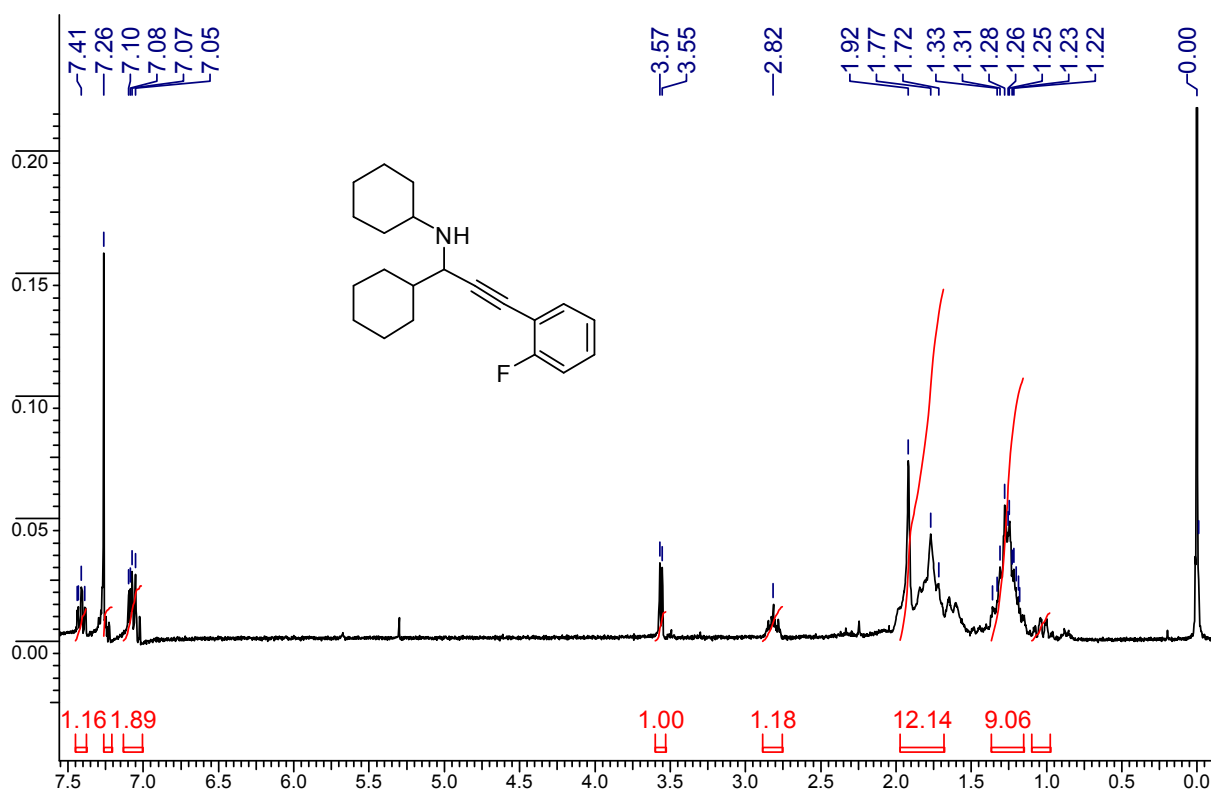

**<sup>13</sup>C NMR of *N*-(1-cyclohexyl-3-(2-fluorophenyl)prop-2-ynyl)cyclohexanamine (4p)**

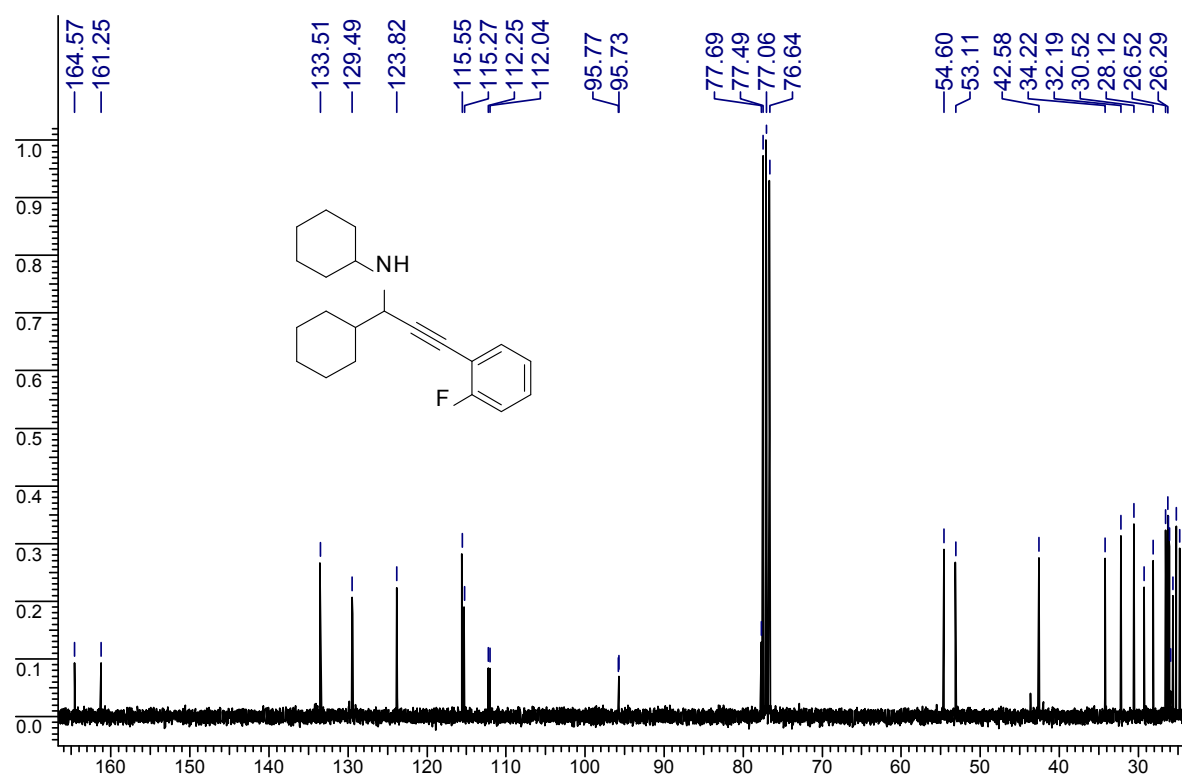

# $^1\text{H}$ NMR and $^{13}\text{C}$ of *N*-(1-*p*-tolyl-oct-2-ynyl)cyclopentanamine (4q)

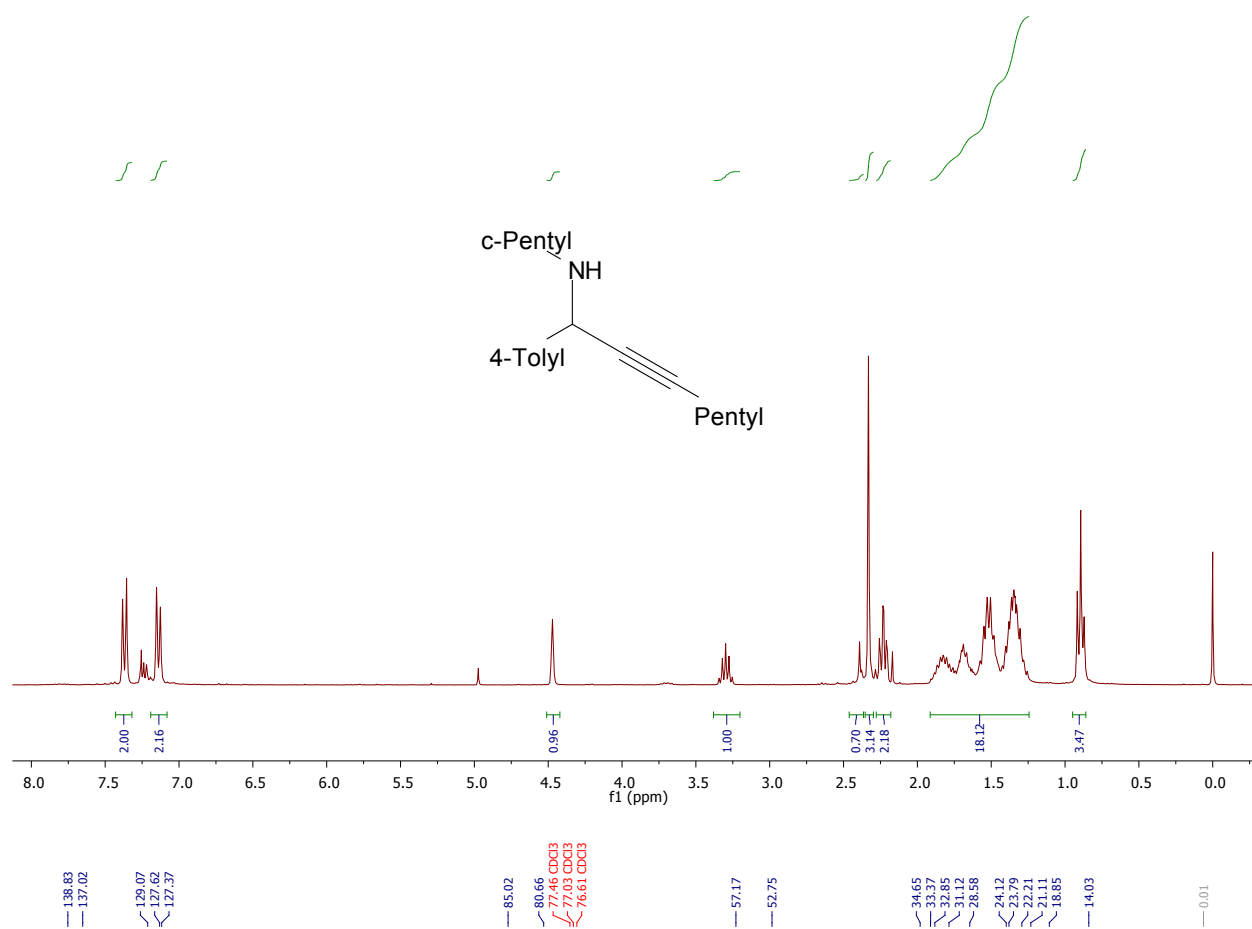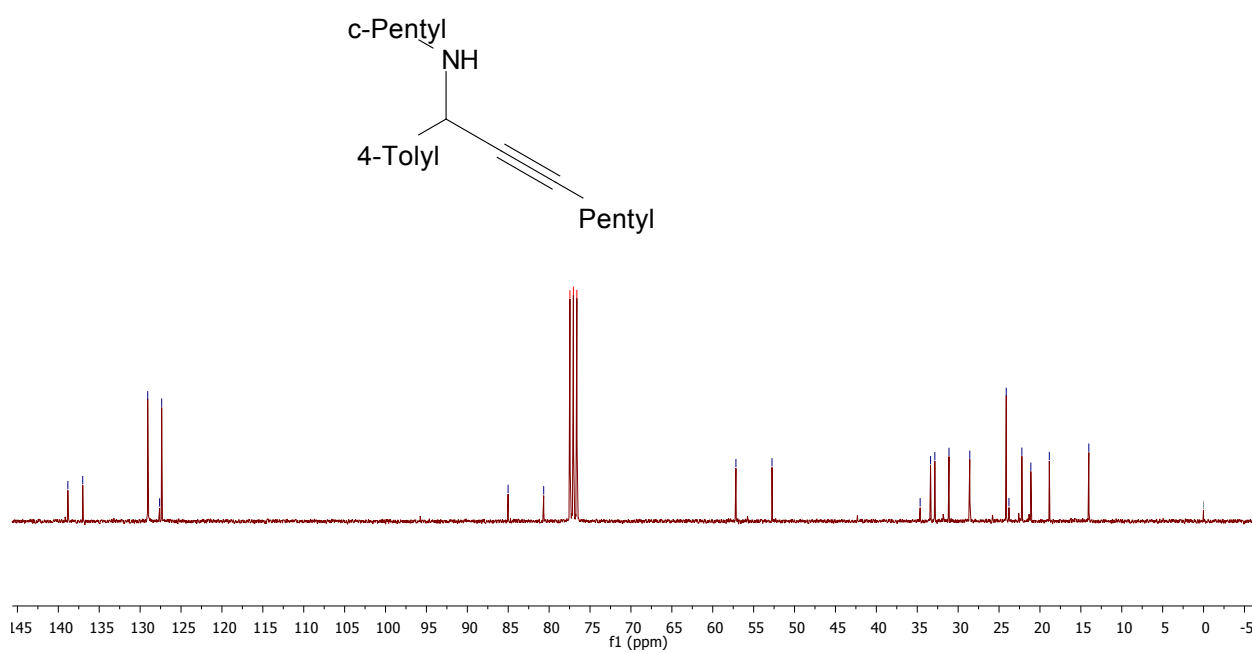

### <sup>1</sup>H NMR of *N*-(1-cyclohexyl-3-(4-pentylphenyl)prop-2-ynyl)cyclopentanamine (4r)

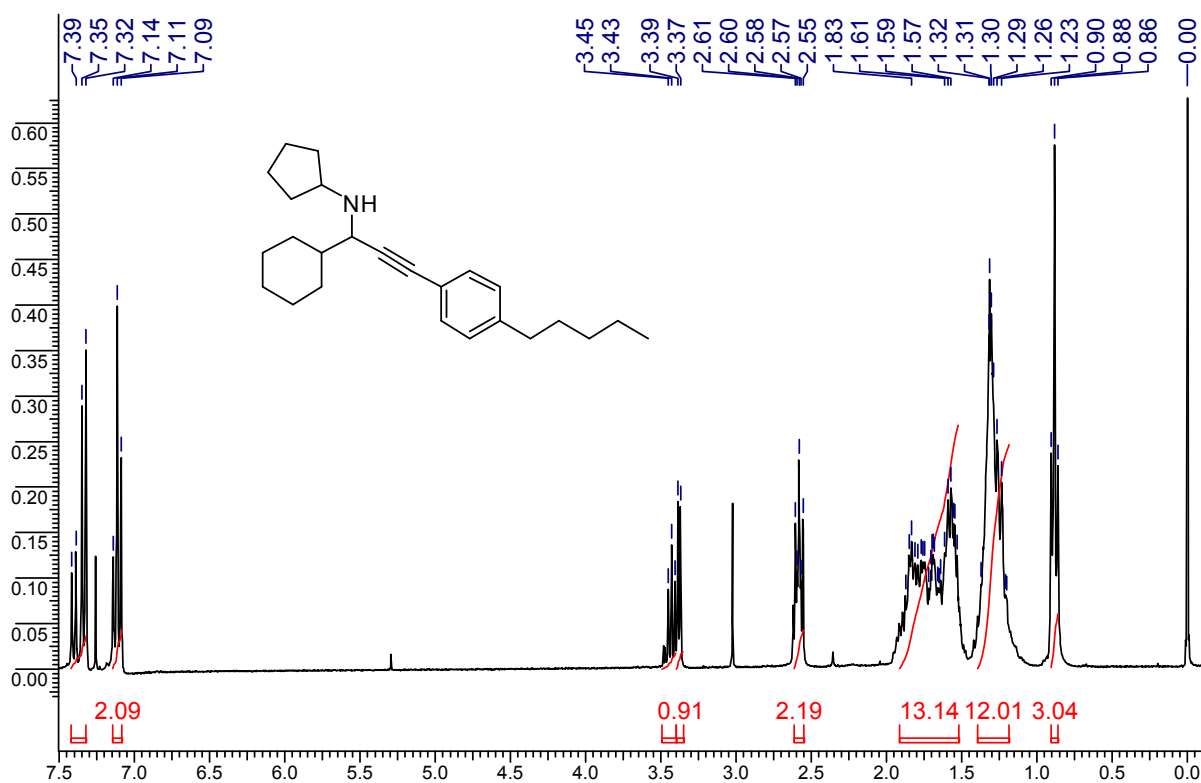

### <sup>13</sup>C NMR of *N*-(1-cyclohexyl-3-(4-pentylphenyl)prop-2-ynyl)cyclopentanamine (4r)

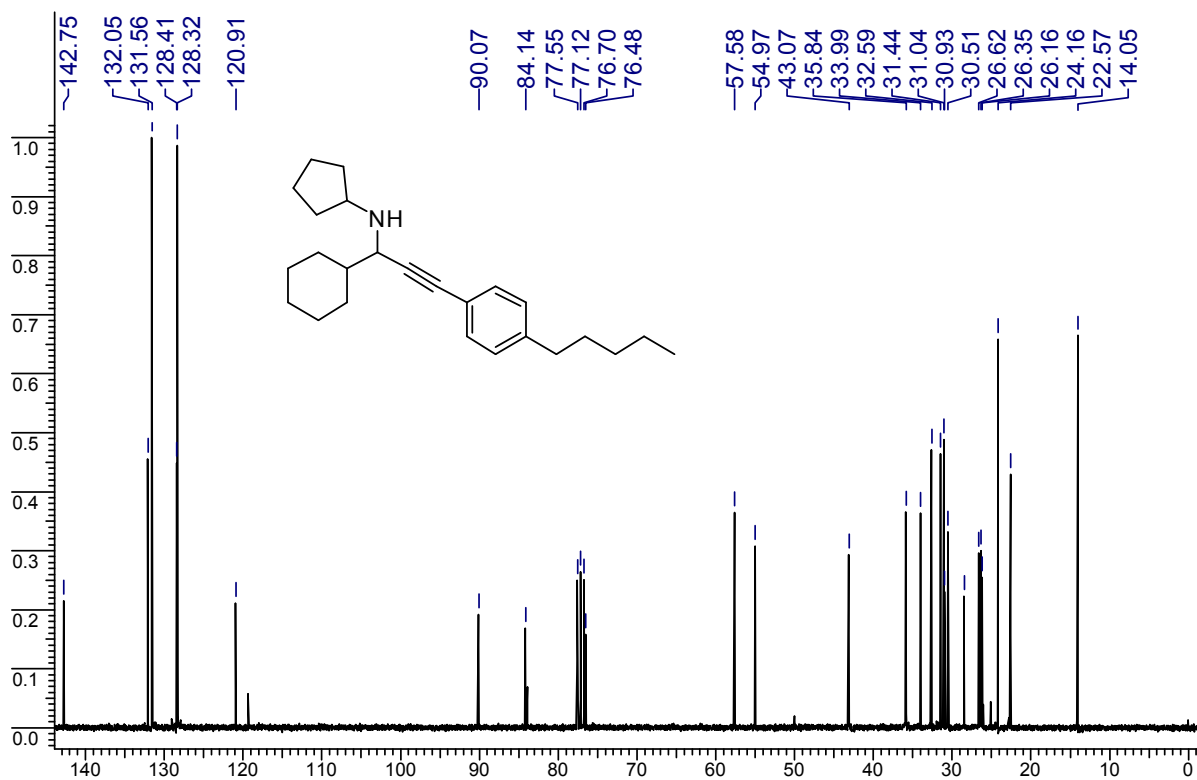

**<sup>1</sup>H NMR and <sup>13</sup>C of *N*-(5-methyl-1-phenylhex-1-yn-3-yl)cyclododecanamine (4s)**

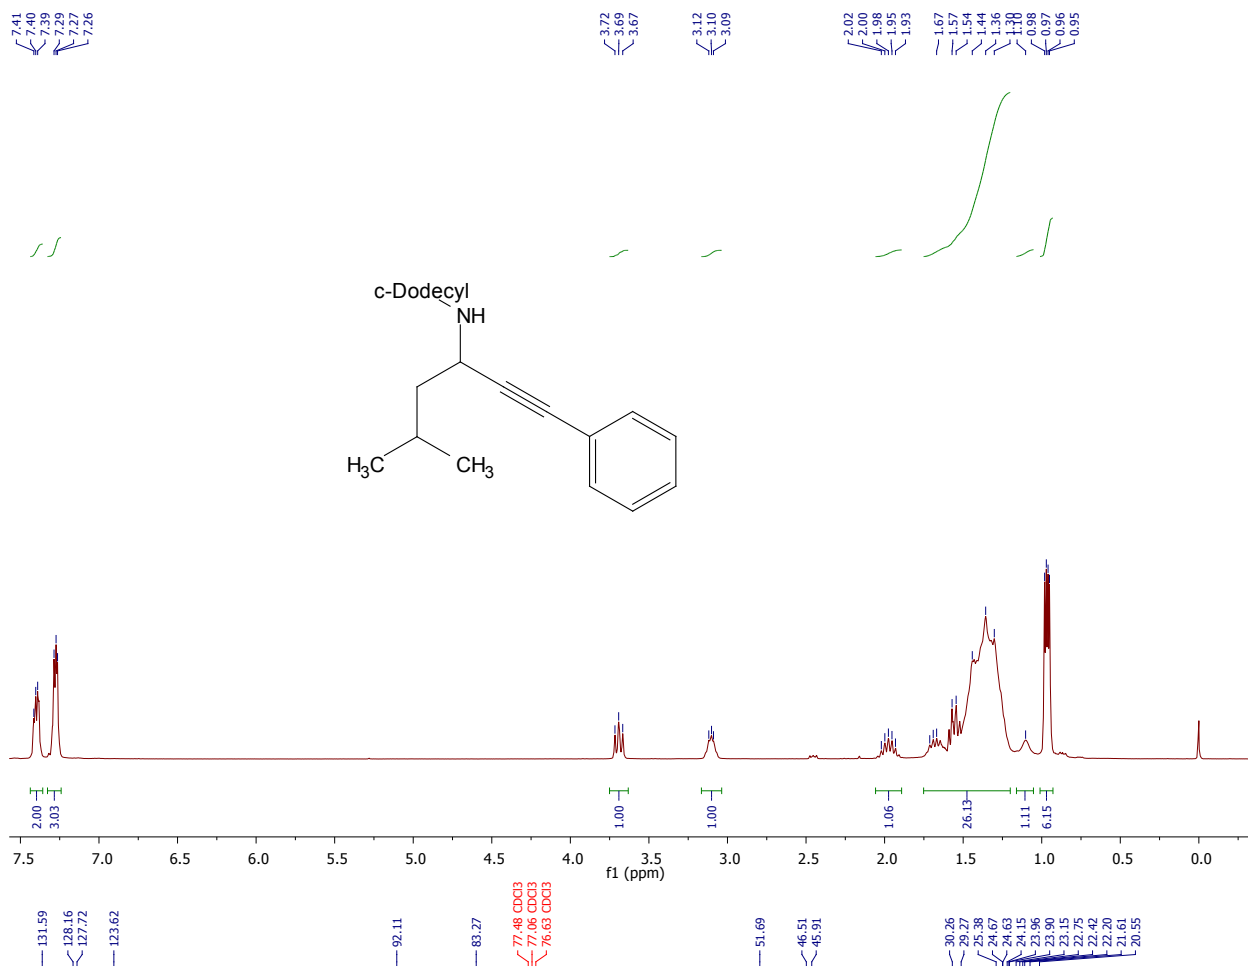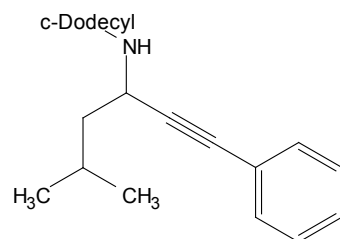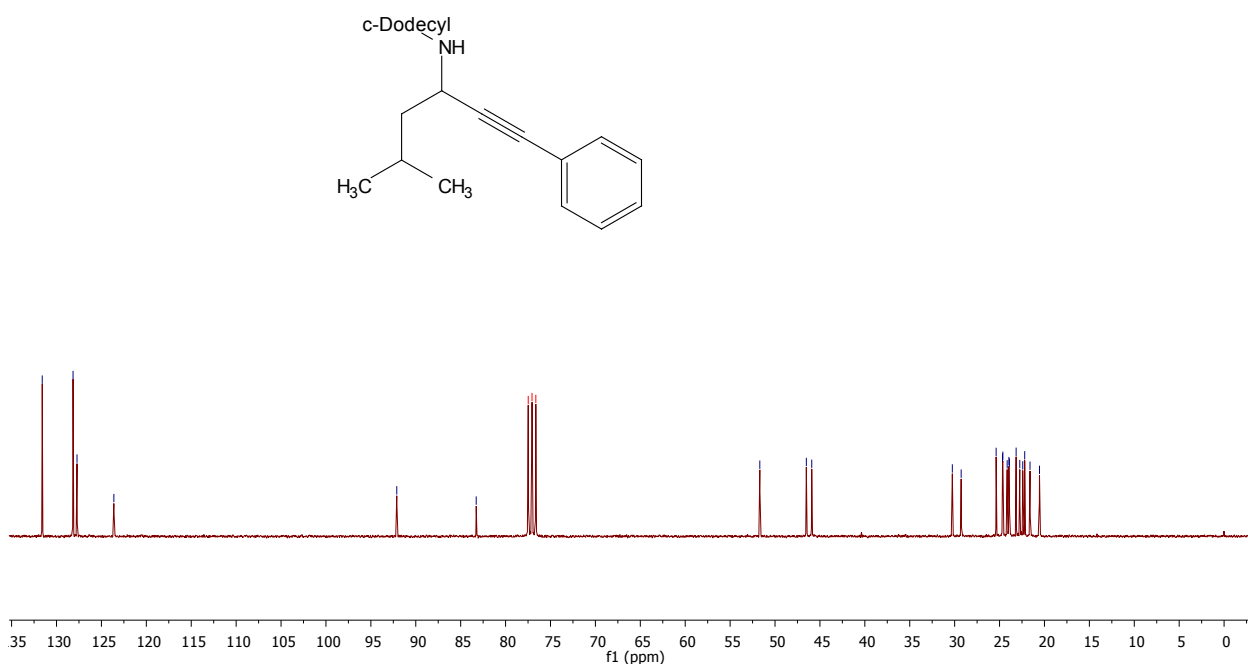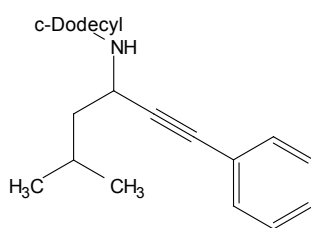

**<sup>1</sup>H NMR and <sup>13</sup>C of *N*-(5-methyl-1-phenylhex-1-yn-3-yl)cycloheptanamine (4t)**

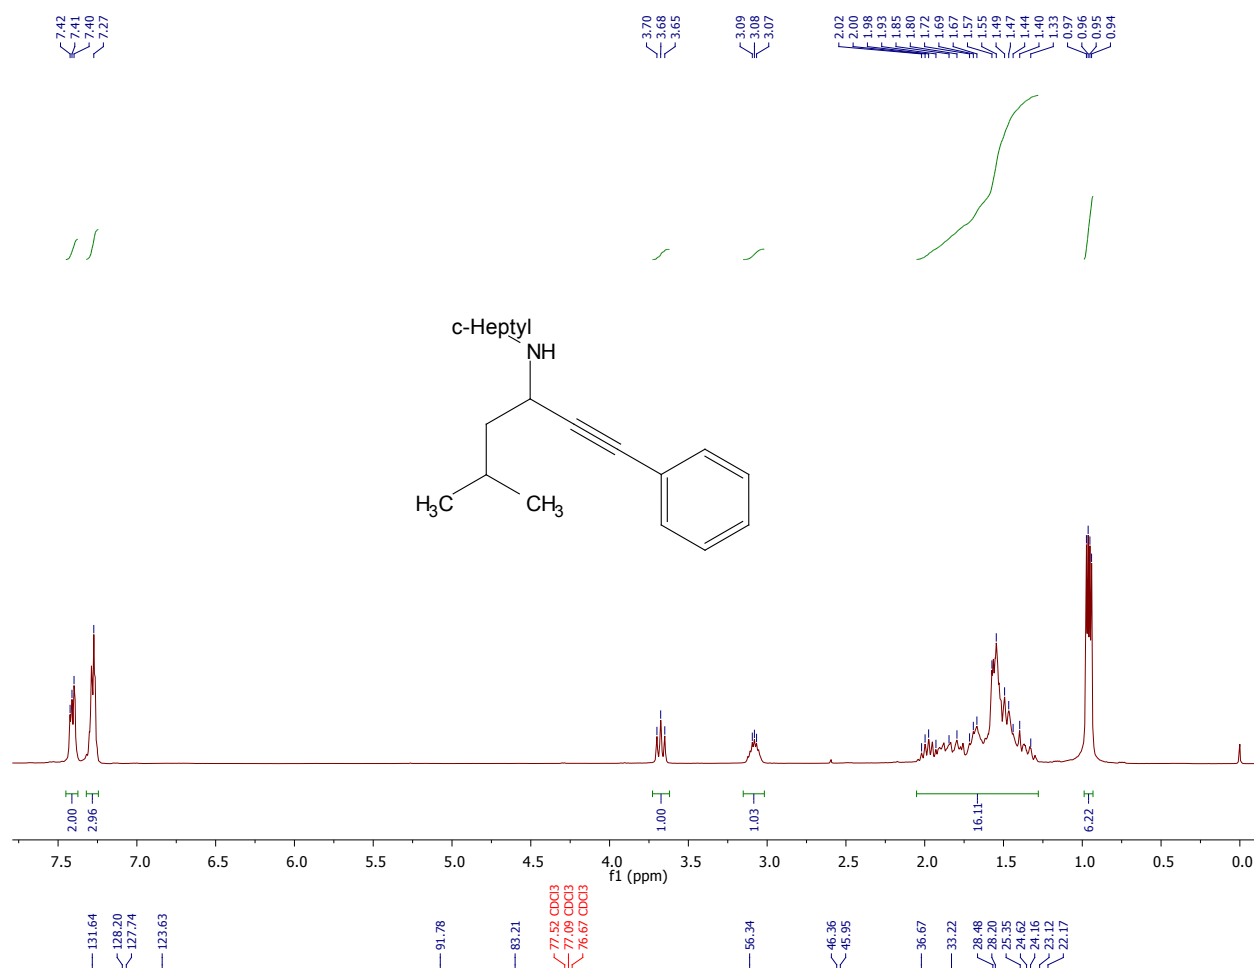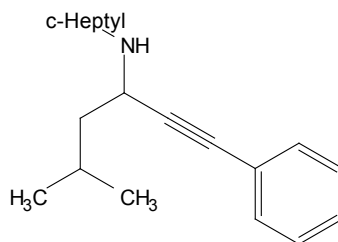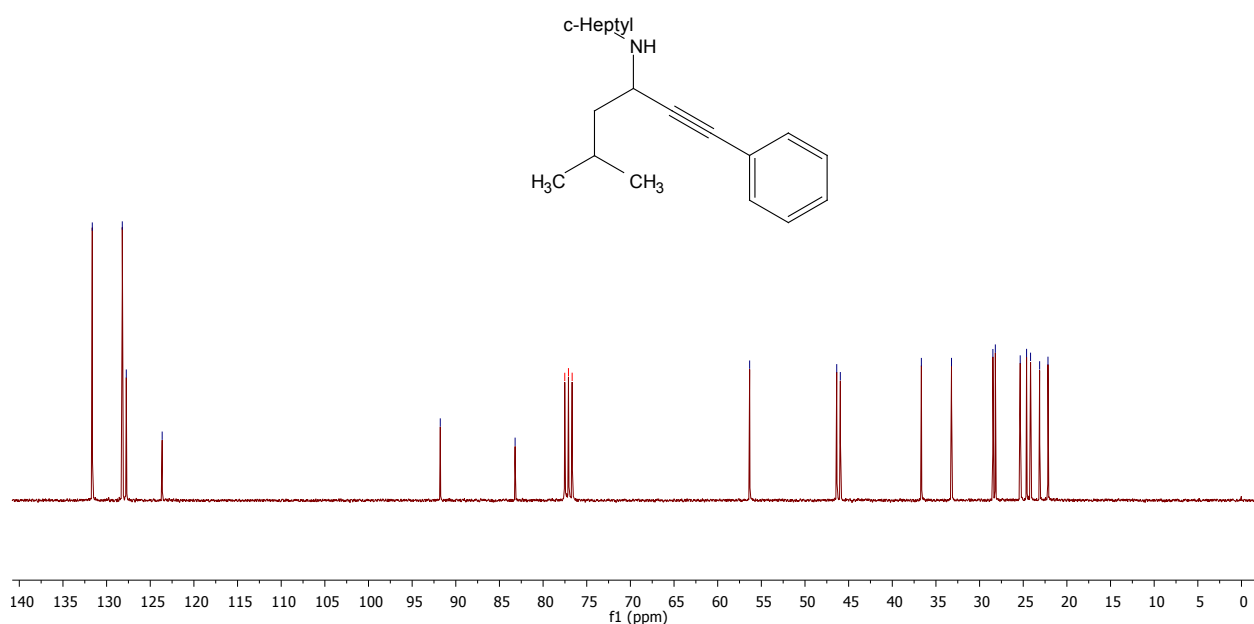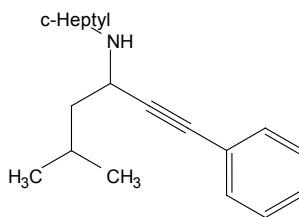

# $^1\text{H}$ NMR and $^{13}\text{C}$ of *N*-(1-Phenyl-oct-1-yn-3-yl)cyclooctanamine (4u)

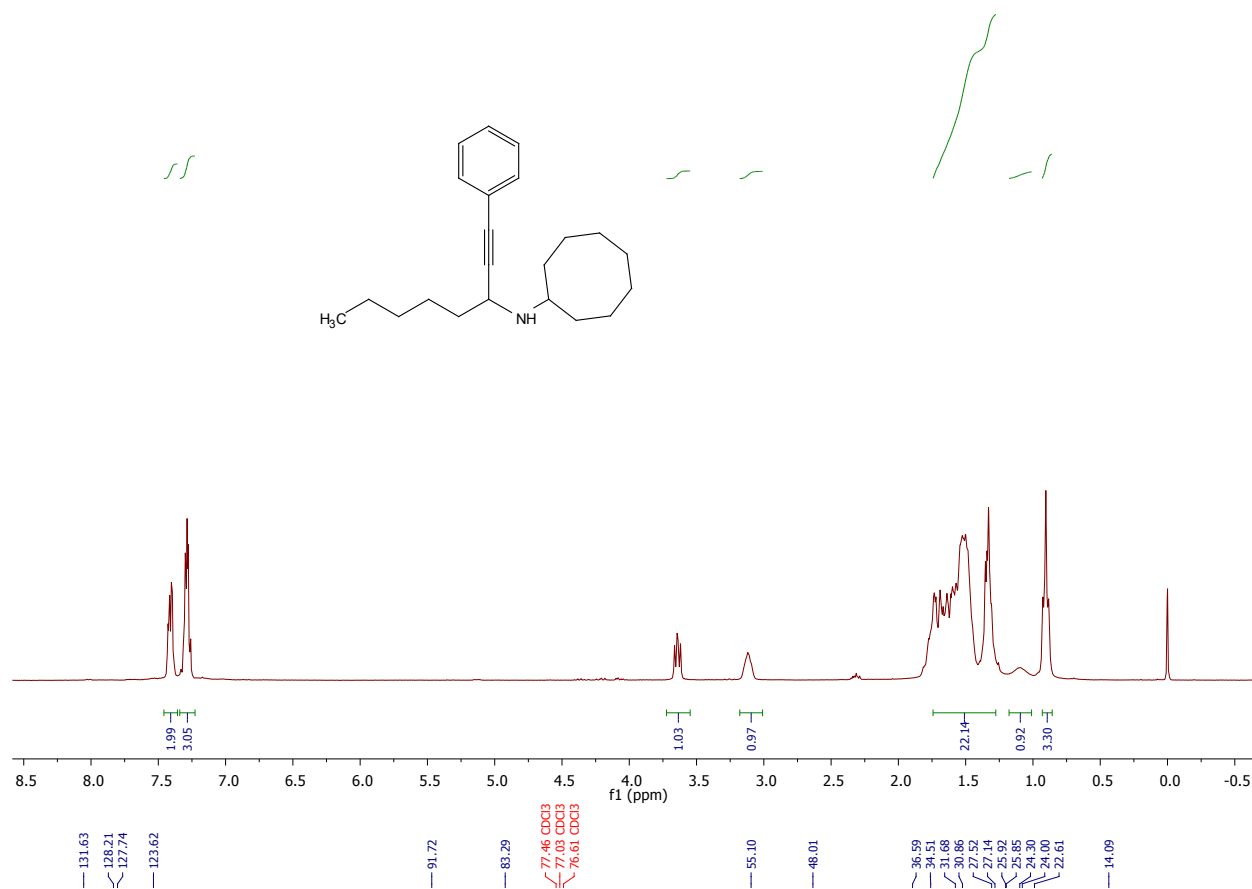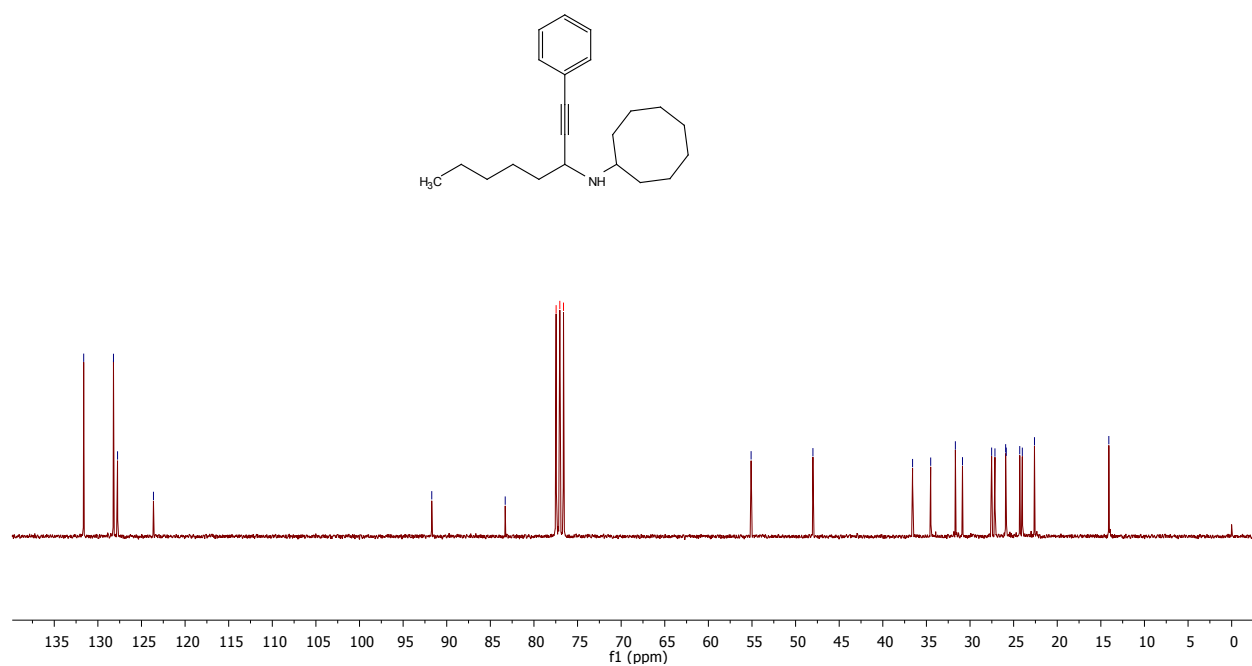

Supplement: c4ra16005c1.pdf [file c4ra16005c1.pdf]
